# Supplementary material for: Different types of components obtained from Monascus purpureus with neuroprotective and anti-inflammatory potentials
Source: Royal Society of Chemistry journal article supplement (doi:10.1039/d1fo01711j), 2021-01-01
Supplement: d1fo01711j1.pdf [file d1fo01711j1.pdf]

## **Different types of components obtained from *Monascus purpureus* with neuroprotective and anti-inflammatory potentials**

Ho-Cheng Wu <sup>a,b</sup>, Yih-Fung Chen <sup>a,b,c</sup>, Ming-Jen Cheng <sup>d</sup>, Ming-Der Wu <sup>d</sup>, Yen-Lin Chen <sup>d</sup>,  
Hsun-Shuo Chang <sup>a,b,c,\*</sup>

<sup>a</sup>Graduate Institute of Natural Products, College of Pharmacy, Kaohsiung Medical University, Kaohsiung 807, Taiwan

<sup>b</sup>School of Pharmacy, College of Pharmacy, Kaohsiung Medical University, Kaohsiung 807, Taiwan

<sup>c</sup>Department of Medicinal Research, Kaohsiung Medical University Hospital, Kaohsiung 807, Taiwan

<sup>d</sup>Bioresource Collection and Research Center (BCRC), Food Industry Research and Development Institute (FIRDI), Hsinchu 300, Taiwan

\* Corresponding author. School of Pharmacy, College of Pharmacy, Kaohsiung Medical University, 100 Shih-Chuan First Road, Kaohsiung City 80708, Taiwan, ROC.

E-mail: [hschang@kmu.edu.tw](mailto:hschang@kmu.edu.tw) (H.-S. Chang) ; Tel: +886-7312-1101 ext. 2664; Fax: +886-7321-0683

## Appendix A. Supplementary data

|                                                                                                                    |    |
|--------------------------------------------------------------------------------------------------------------------|----|
| Figure S1. <sup>1</sup> H NMR spectrum of monapyridine A (1) in CDCl <sub>3</sub> at 400 MHz .....                 | 4  |
| Figure S2. <sup>13</sup> C NMR spectrum of monapyridine A (1) in CDCl <sub>3</sub> at 100 MHz .....                | 4  |
| Figure S3. DEPT spectrum of monapyridine A (1) .....                                                               | 5  |
| Figure S4. HSQC spectrum of monapyridine A (1) .....                                                               | 5  |
| Figure S5. COSY spectrum of monapyridine A (1) .....                                                               | 6  |
| Figure S6. HMBC spectrum of monapyridine A (1) .....                                                               | 6  |
| Figure S7. NOESY spectrum of monapyridine A (1) .....                                                              | 7  |
| Figure S8. HRESIMS spectrum of monapyridine A (1) .....                                                            | 7  |
| Figure S9. <sup>1</sup> H NMR spectrum of monatetralone A (2) in acetone- <i>d</i> <sub>6</sub> at 600 MHz .....   | 8  |
| Figure S10. <sup>13</sup> C NMR spectrum of monatetralone A (2) in acetone- <i>d</i> <sub>6</sub> at 125 MHz ..... | 8  |
| Figure S11. DEPT spectrum of monatetralone A (2) .....                                                             | 9  |
| Figure S12. COSY spectrum of monatetralone A (2) .....                                                             | 9  |
| Figure S13. HMBC spectrum of monatetralone A (2) .....                                                             | 10 |
| Figure S14. NOESY spectrum of monatetralone A (2) .....                                                            | 10 |
| Figure S15. HRESIMS spectrum of monatetralone A (2) .....                                                          | 11 |
| Figure S16. <sup>1</sup> H NMR spectrum of monatetralone B (3) in CDCl <sub>3</sub> at 600 MHz .....               | 11 |
| Figure S17. <sup>13</sup> C NMR spectrum of monatetralone B (3) in CDCl <sub>3</sub> at 125 MHz .....              | 12 |
| Figure S18. DEPT spectrum of monatetralone B (3) .....                                                             | 12 |
| Figure S19. COSY spectrum of monatetralone B (3) .....                                                             | 13 |
| Figure S20. HMBC spectrum of monatetralone B (3) .....                                                             | 13 |
| Figure S21. NOESY spectrum of monatetralone B (3) .....                                                            | 14 |
| Figure S22. HRESIMS spectrum of monatetralone B (3) .....                                                          | 14 |
| Figure S23. <sup>1</sup> H NMR spectrum of monatetralone C (4) in CD <sub>3</sub> OD at 600 MHz .....              | 15 |
| Figure S24. <sup>13</sup> C NMR spectrum of monatetralone C (4) in CD <sub>3</sub> OD at 125 MHz .....             | 15 |
| Figure S25. DEPT spectrum of monatetralone C (4) .....                                                             | 16 |
| Figure S26. COSY spectrum of monatetralone C (4) .....                                                             | 16 |
| Figure S27. HMBC spectrum of monatetralone C (4) .....                                                             | 17 |
| Figure S28. NOESY spectrum of monatetralone C (4) .....                                                            | 17 |
| Figure S29. HRESIMS spectrum of monatetralone C (4) .....                                                          | 18 |
| Figure S30. <sup>1</sup> H NMR spectrum of monatetralone D (5) in CD <sub>3</sub> OD at 400 MHz .....              | 18 |
| Figure S31. <sup>13</sup> C NMR spectrum of monatetralone D (5) in CD <sub>3</sub> OD at 100 MHz .....             | 19 |
| Figure S32. DEPT spectrum of monatetralone D (5) .....                                                             | 19 |
| Figure S33. COSY spectrum of monatetralone D (5) .....                                                             | 20 |
| Figure S34. HMBC spectrum of monatetralone D (5) .....                                                             | 20 |
| Figure S35. NOESY spectrum of monatetralone D (5) .....                                                            | 21 |
| Figure S36. HRESIMS spectrum of monatetralone D (5) .....                                                          | 21 |
| Figure S37. <sup>1</sup> H NMR spectrum of monatetralone E (6) in CDCl <sub>3</sub> at 600 MHz .....               | 22 |

|                                                                                                                                                            |    |
|------------------------------------------------------------------------------------------------------------------------------------------------------------|----|
| Figure S38. <sup>13</sup> C NMR spectrum of monatetralone E (6) in CDCl <sub>3</sub> at 125 MHz.....                                                       | 22 |
| Figure S39. DEPT spectrum of monatetralone E (6).....                                                                                                      | 23 |
| Figure S40. COSY spectrum of monatetralone E (6).....                                                                                                      | 23 |
| Figure S41. HMBC spectrum of monatetralone E (6).....                                                                                                      | 24 |
| Figure S42. NOESY spectrum of monatetralone E (6).....                                                                                                     | 24 |
| Figure S43. HRESIMS spectrum of monatetralone E (6).....                                                                                                   | 25 |
| Figure S44. <sup>1</sup> H NMR spectrum of monabenzofuranone (7) in CDCl <sub>3</sub> at 400 MHz.....                                                      | 25 |
| Figure S45. <sup>13</sup> C NMR spectrum of monabenzofuranone (7) in CDCl <sub>3</sub> at 100 MHz.....                                                     | 26 |
| Figure S46. DEPT spectrum of monabenzofuranone (7).....                                                                                                    | 26 |
| Figure S47. COSY spectrum of monabenzofuranone (7).....                                                                                                    | 27 |
| Figure S48. HMBC spectrum of monabenzofuranone (7).....                                                                                                    | 27 |
| Figure S49. NOESY spectrum of monabenzofuranone (7).....                                                                                                   | 28 |
| Figure S50. HRESIMS spectrum of monabenzofuranone (7).....                                                                                                 | 28 |
| Figure S51. (A) HPLC chromatographic profile of red mold rice from <i>Monascus purpureus</i> BCRC 38110. (B) HPLC chromatographic profile of citrinin..... | 29 |
| Figure S52. The isolation flowchart of <i>M. purpureus</i> BCRC 38110.....                                                                                 | 30 |

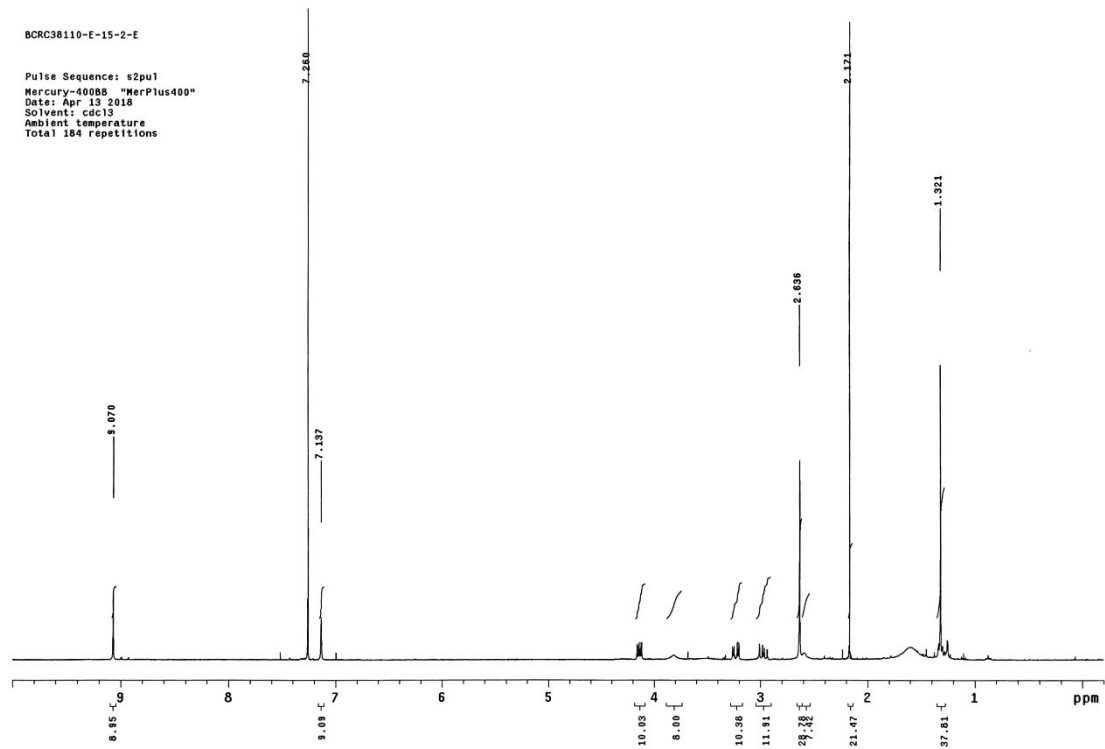

Figure S1.  $^1\text{H}$  NMR spectrum of monapyridine A (**1**) in  $\text{CDCl}_3$  at 400 MHz

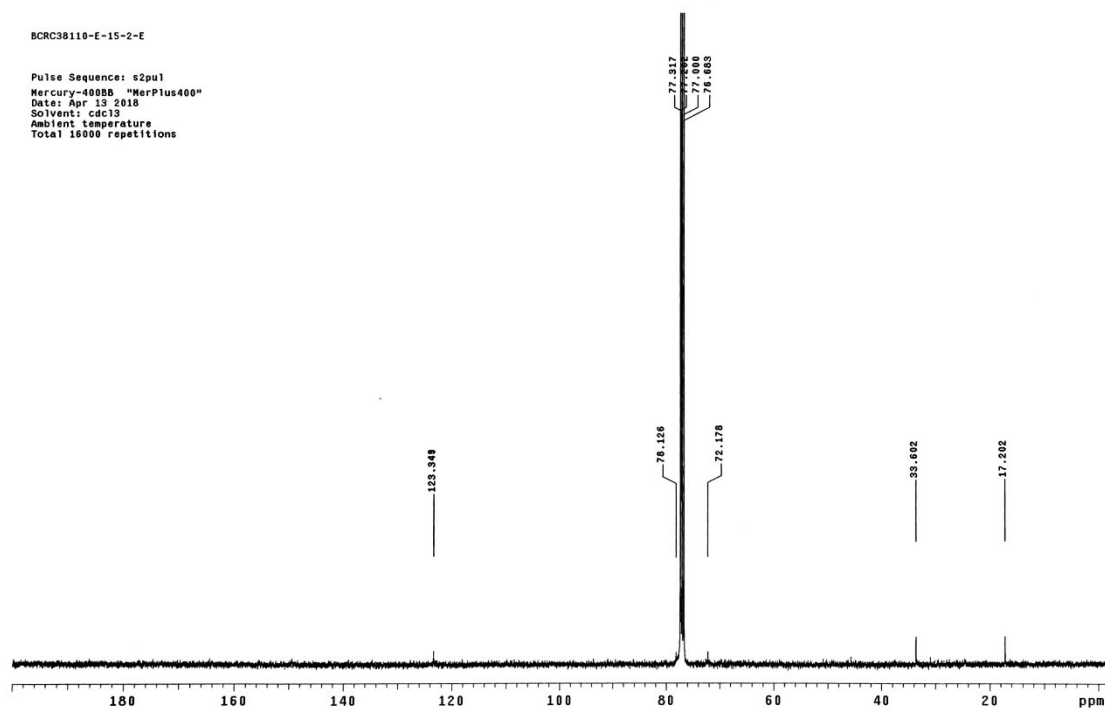

Figure S2.  $^{13}\text{C}$  NMR spectrum of monapyridine A (**1**) in  $\text{CDCl}_3$  at 100 MHz

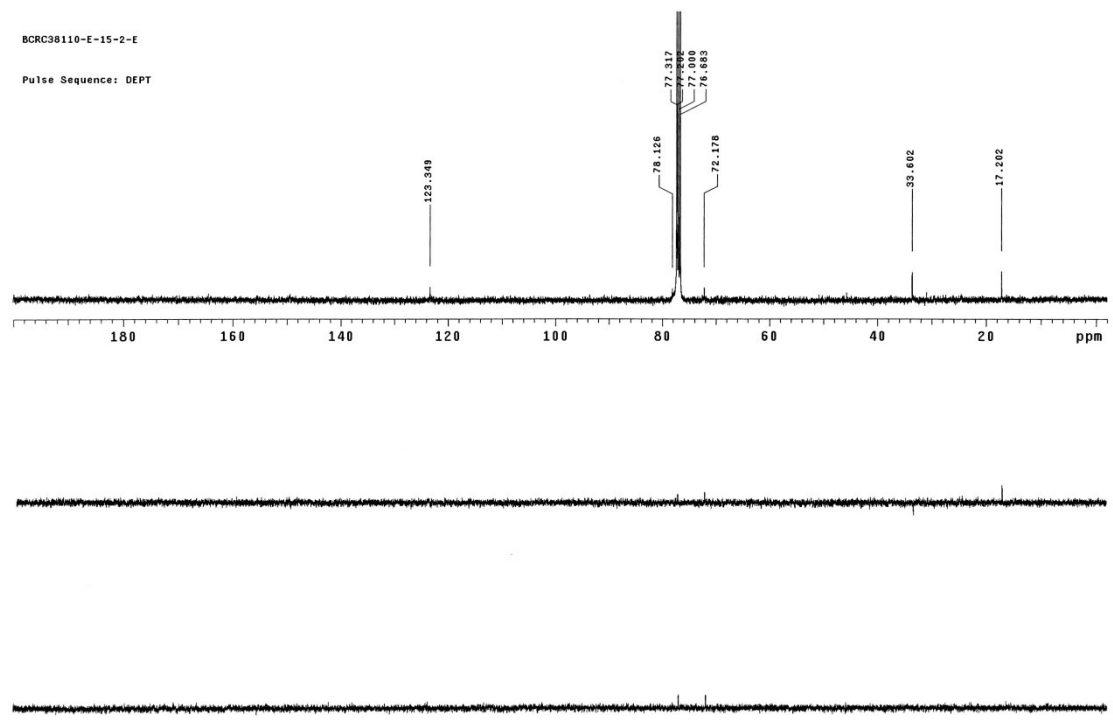

Figure S3. DEPT spectrum of monapyridine A (1)

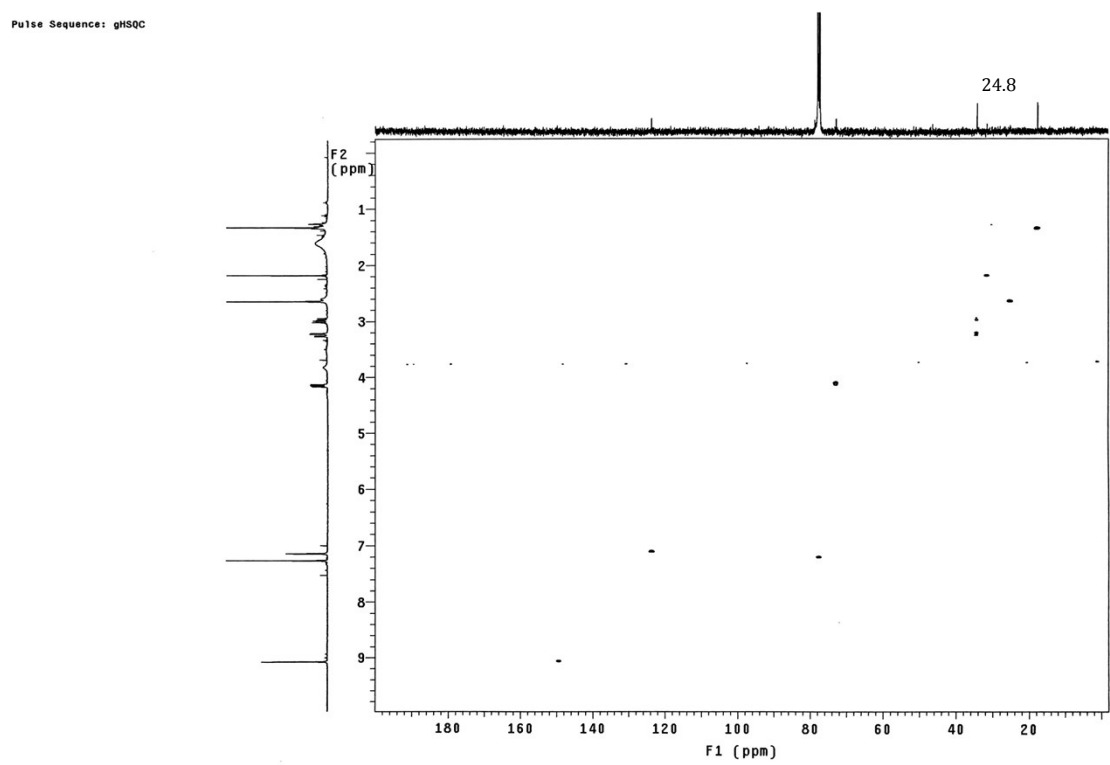

Figure S4. HSQC spectrum of monapyridine A (1)

BCRC38110-E-15-2-E

exp14 gCOSY

```
SAMPLE          FLAGS
date Apr 13 2018 hs nn
solvent cdc13 sspul y
sample          hsglv1 1224
ACQUISITION    SPECIAL
sv 840.3 temp not used
at 0.150 gain 39
np 1920 spin 0
fb not used F2 PROCESSING 0
ss 32 sb -0.075
dl 1.000 sbs not used
nt 48 fn 4096
2D ACQUISITION F1 PROCESSING
sw1 640.3 sb1 -0.020
nl 160 sbs1 not used
d2 0 proc1 1p
PRESATURATION  fn1 4096
satmode n DISPLAY -80.2
wet n sp -4081.5
TRANSMITTER n wp 4081.5
tn H1 sp1 -80.2
sfrq 400.001 wp1 4081.5
tof 600.0 rf1 568.4
tpwr 61 rfp 0
pw 11.600 rf11 568.4
GRADIENTS      rfp1 0
gz1w1e 1028 PLOT
g1e 0.001000 wc 140.0
Edratio 1.000 sc 5.0
gstab 0.000500 w2 140.0
DECOUPLER      sc2 5.0
dn C13 vs 100
dm nm tn 8
a1 cdc av 8
```

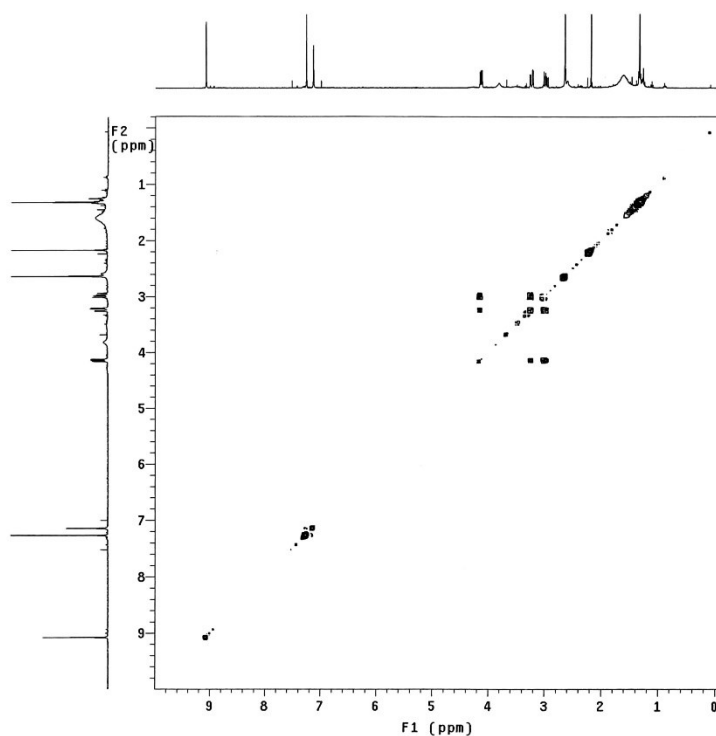

Figure S5. COSY spectrum of monapyridine A (1)

Pulse Sequence: gHMBC

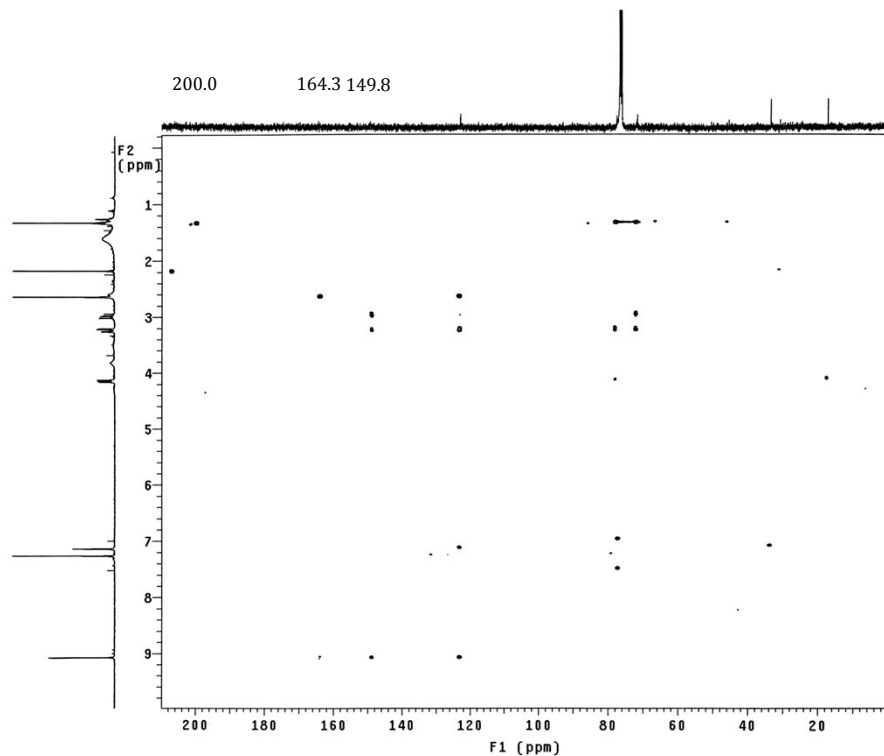

Figure S6. HMBC spectrum of monapyridine A (1)

BCRC38110-E-15-2-E

exp15 NOESY

```
SAMPLE          FLAGS
date Apr 13 2018 hs nn
solvent cdc13 sspu1 y
sample PFOFg y
ACQUISITION     SPECIAL 1224
sv 8410.3
at 0.150 temp not used
np 1920 gain 38
fb not used spin 0
ss 32 F2 PROCESSING
d1 1.000 gr 0.069
nt 48 gfs not used
2D ACQUISITION  fn 4096
sw1 8410.3 F1 PROCESSING
n1 160 gf1 0.020
TRANSMITTER     h1 not used
tn H1 proc1 1p
sfrq 400.401 fn1 4096
tof 600.0 DISPLAY
tpwr 51 sp -80.2
pw 11.600 wp 5483.8
NOESY          sp1 -80.2
mixN           wpt 5483.8
PRESATURATION  n rf1 568.4
satmode       n rfp 0
wet           n rf11 568.4
DECOUPLER     C13 rfp1 0
dn nnn
dm          wc 140.0
           sc 5.0
           wc2 140.0
           sc2 5.0
           vs 100
           th
           al cdc ph 2
```

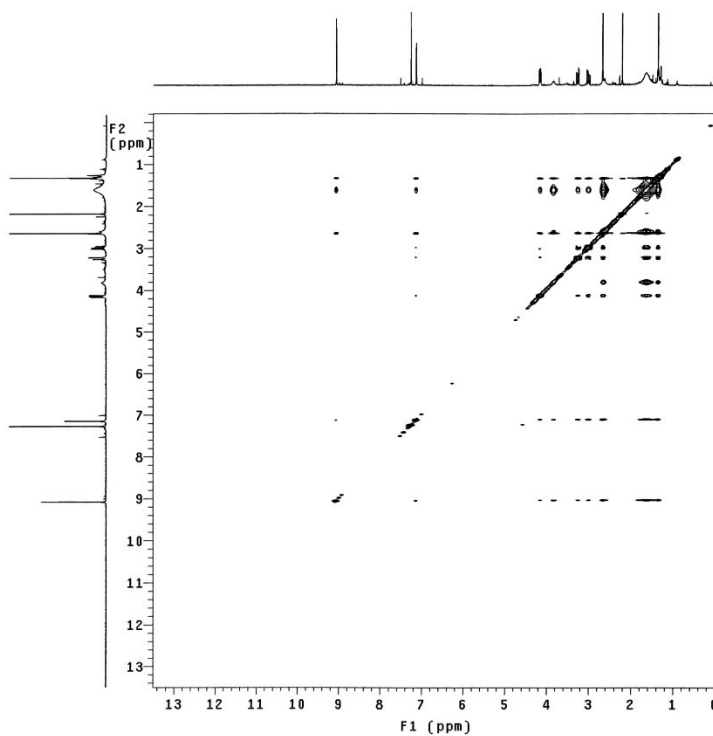

Figure S7. NOESY spectrum of monapyridine A (1)

### Mass Spectrum SmartFormula Report

#### Analysis Info

Analysis Name D:\Data\7\BCRC38110E152E\_000001.d  
Method broadband first signal  
Sample Name BCRC48110-E-15-2-E  
Comment ESI Positive

3/12/2018 3:51:26 PM  
Operator: YU HSIAO-CHING  
Instrument: BRUKER FT-MS solarix

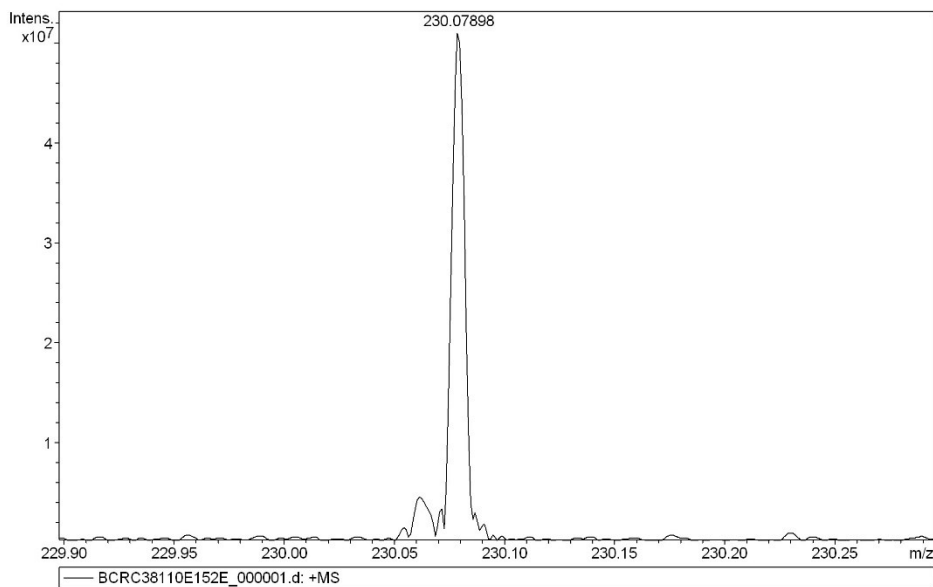

| Meas. m/z | # | Formula            | Score  | m/z       | err [mDa] | err [ppm] | mSigma | rdb | e <sup>-</sup> Conf | N-Rule |
|-----------|---|--------------------|--------|-----------|-----------|-----------|--------|-----|---------------------|--------|
| 230.07898 | 1 | C 11 H 13 N Na O 3 | 100.00 | 230.07876 | -0.22     | -0.94     | 8.4    | 5.5 | even                | ok     |

Figure S8. HRESIMS spectrum of monapyridine A (1)

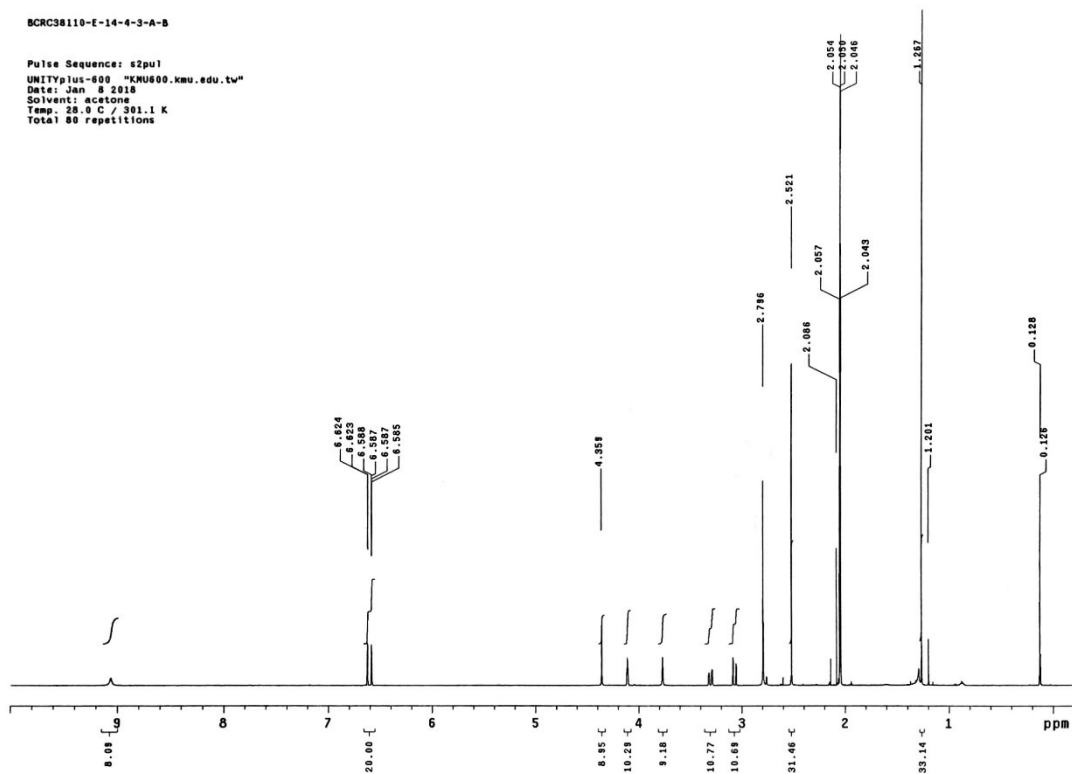

Figure S9.  $^1\text{H}$  NMR spectrum of monatetralone A (**2**) in acetone- $d_6$  at 600 MHz

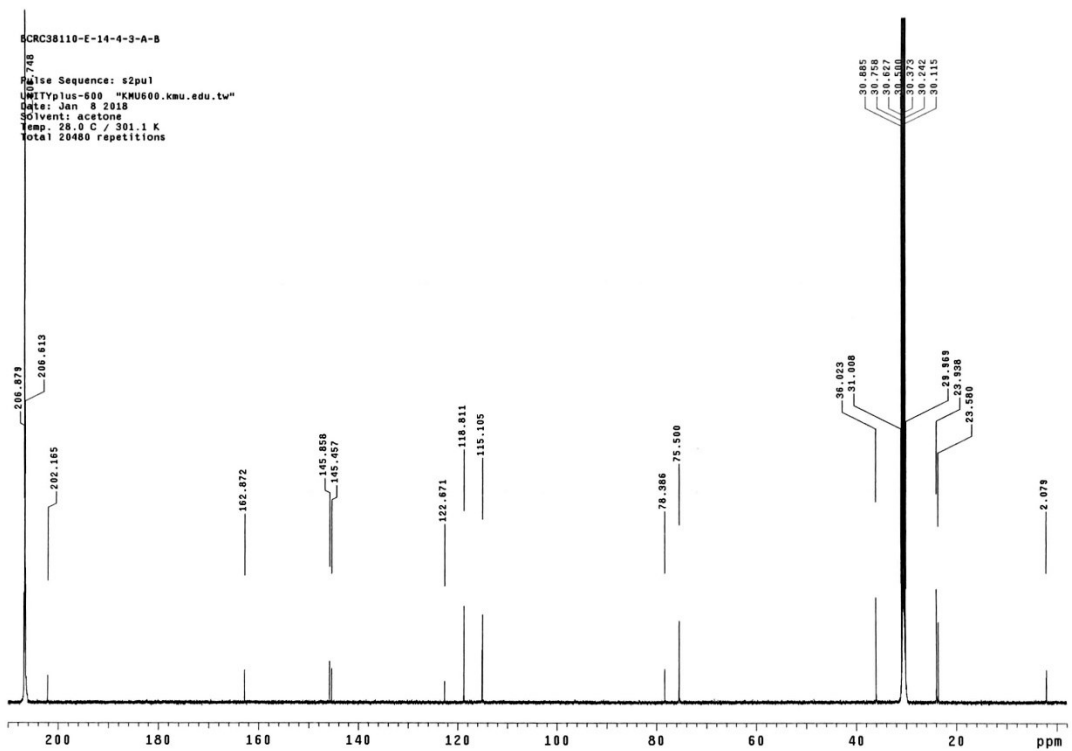

Figure S10.  $^{13}\text{C}$  NMR spectrum of monatetralone A (**2**) in acetone- $d_6$  at 125 MHz



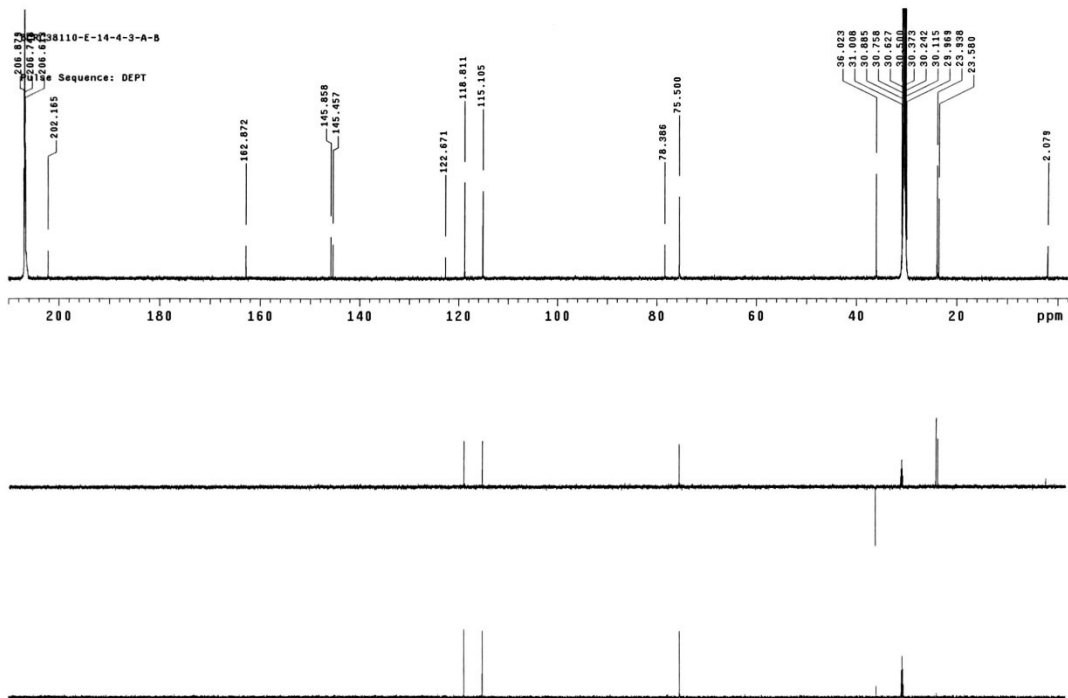

Figure S11. DEPT spectrum of monatetralone A (2)

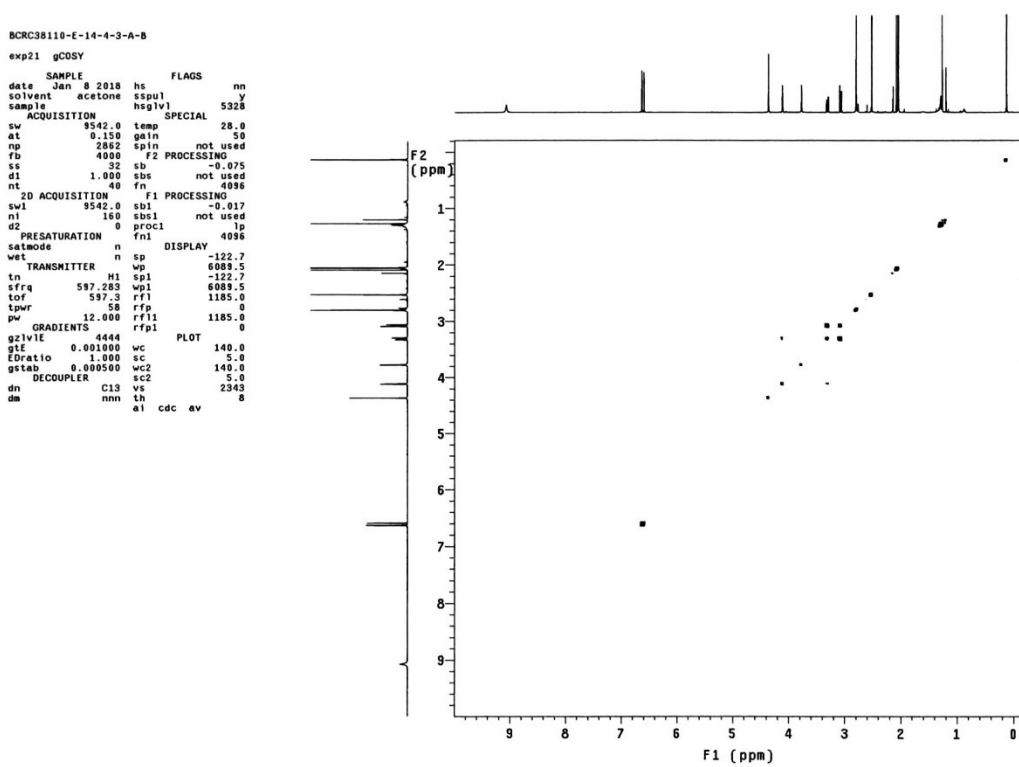

Figure S12. COSY spectrum of monatetralone A (2)

BCRC38110-E-14-4-3-A-B  
Pulse Sequence: gHMBCAD

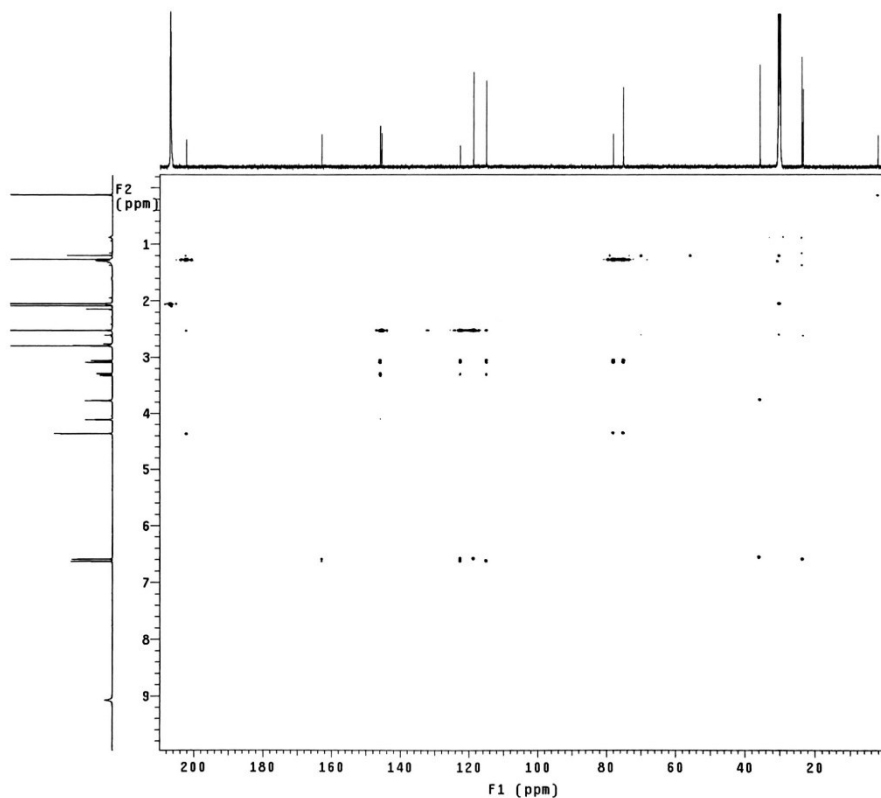

Figure S13. HMBC spectrum of monatetralone A (2)

BCRC38110-E-14-4-3-A-B  
exp22 NOESY

| SAMPLE         |            | hs      | FLAGS      | nn |
|----------------|------------|---------|------------|----|
| date           | Jan 8 2018 | hs      |            |    |
| solvent        | acetone    | sspu1   | y          |    |
| sample         |            | PFQFg   | y          |    |
| ACQUISITION    |            | hsq1v1  | 5328       |    |
| sw             | 9542.0     | SPECIAL |            |    |
| at             | 0.150      | temp    | 28.0       |    |
| np             | 2882       | gain    | 46         |    |
| rb             | 4000       | spin    | not used   |    |
| ss             | 32         | F2      | PROCESSING |    |
| d1             | 1.500      | gf      | 0.069      |    |
| nt             | 40         | gfs     | not used   |    |
| 2D ACQUISITION |            | fn      | 4096       |    |
| swi            | 9542.0     | f1      | PROCESSING |    |
| ni             | 160        | gf1     | 0.015      |    |
| TRANSMITTER    |            | gfs1    | not used   |    |
| tn             |            | h1      | 1p         |    |
| sfrs           | 597.283    | fn1     | 4096       |    |
| tof            | 597.3      | DISPLAY | -122.7     |    |
| tpwr           | 58         | sp      | 6089.5     |    |
| pw             | 12.000     | wp      | -122.7     |    |
| NOESY          |            | sp1     | 6089.5     |    |
| mixN           | 0.600      | vp1     | 1185.0     |    |
| PRESATURATION  |            | rf1     | 1185.0     |    |
| satmode        | n          | rff     | 0          |    |
| wet            | n          | rf1     | 1185.0     |    |
| DECOUPLER      |            | rfp1    | 0          |    |
| dn             | C13        | PLOT    |            |    |
| dm             | nnn        | wc      | 140.0      |    |
|                |            | sc      | 5.0        |    |
|                |            | wc2     | 140.0      |    |
|                |            | sc2     | 5.0        |    |
|                |            | vs      | 2343       |    |
|                |            | tn      | 4          |    |
|                |            | ai      | cdc ph     |    |

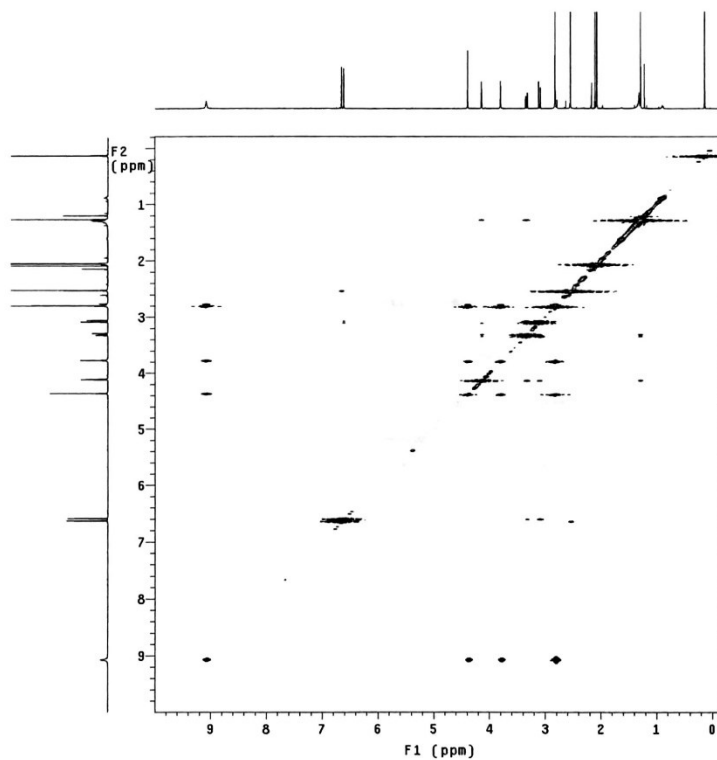

Figure S14. NOESY spectrum of monatetralone A (2)

## Mass Spectrum SmartFormula Report

### Analysis Info

Analysis Name D:\Data\7\BCRC38110E143AB\_000002.d  
Method broadband first signal  
Sample Name BCRC38110-E-14-4-3-A-B  
Comment ESI Positive

2/14/2018 1:17:13 PM  
Operator: YU HSIAO-CHING  
Instrument: BRUKER FT-MS solariX

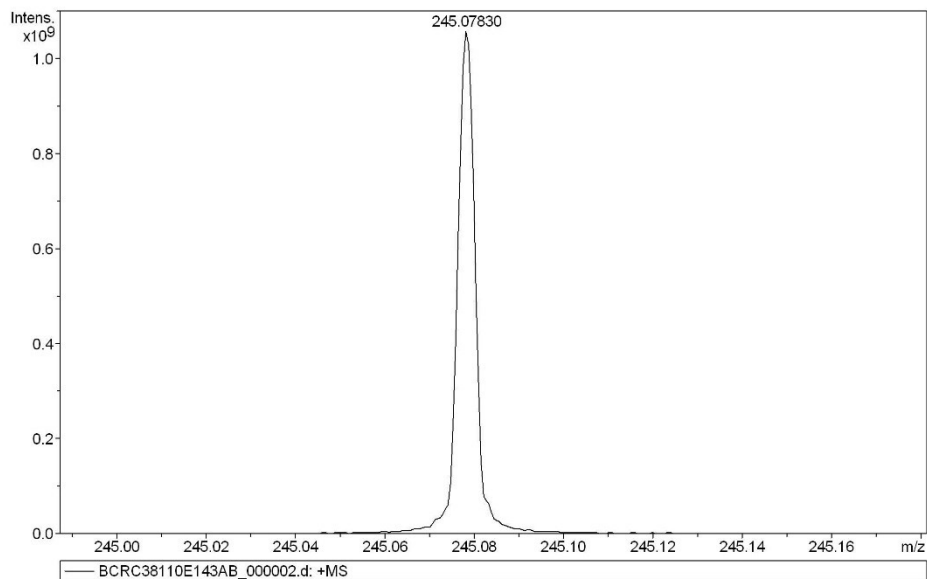

| Meas. m/z | # | Formula                                          | Score  | m/z       | err [mDa] | err [ppm] | mSigma | rdb | e <sup>-</sup> Conf | N-Rule |
|-----------|---|--------------------------------------------------|--------|-----------|-----------|-----------|--------|-----|---------------------|--------|
| 245.07830 | 1 | C <sub>12</sub> H <sub>14</sub> NaO <sub>4</sub> | 100.00 | 245.07843 | 0.13      | 0.53      | 10.1   | 5.5 | even                | ok     |

Figure S15. HRESIMS spectrum of monatetralone A (2)

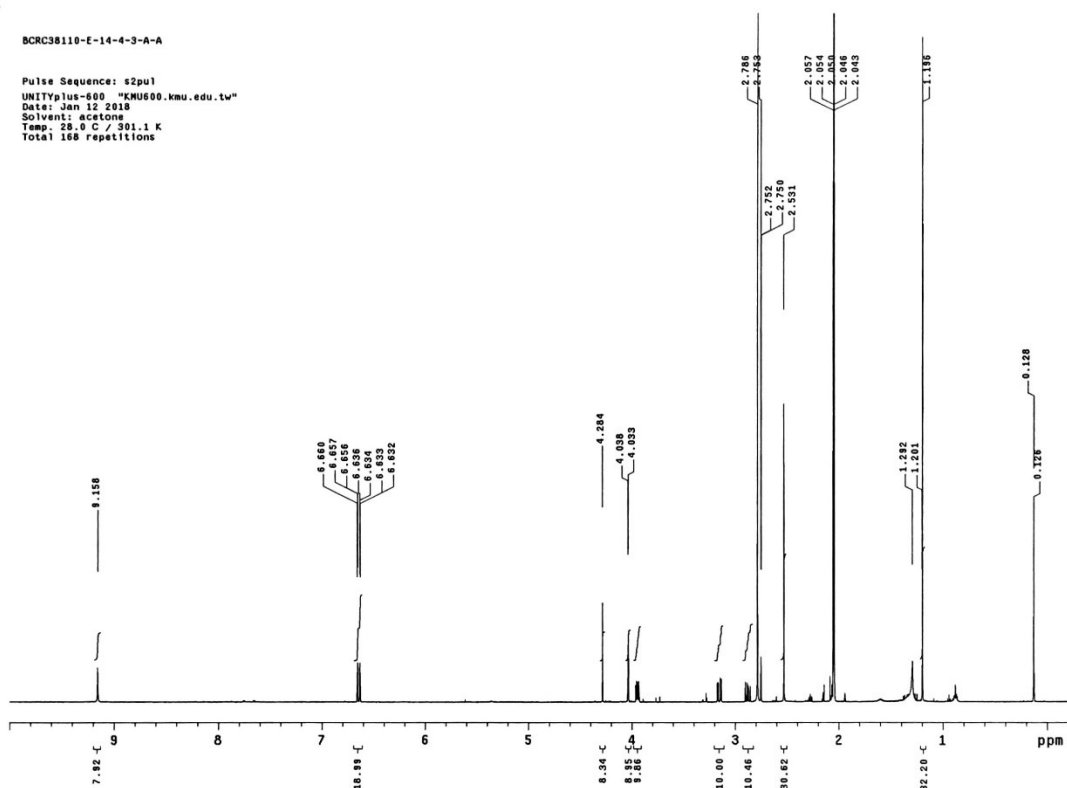

Figure S16. <sup>1</sup>H NMR spectrum of monatetralone B (3) in CDCl<sub>3</sub> at 600 MHz

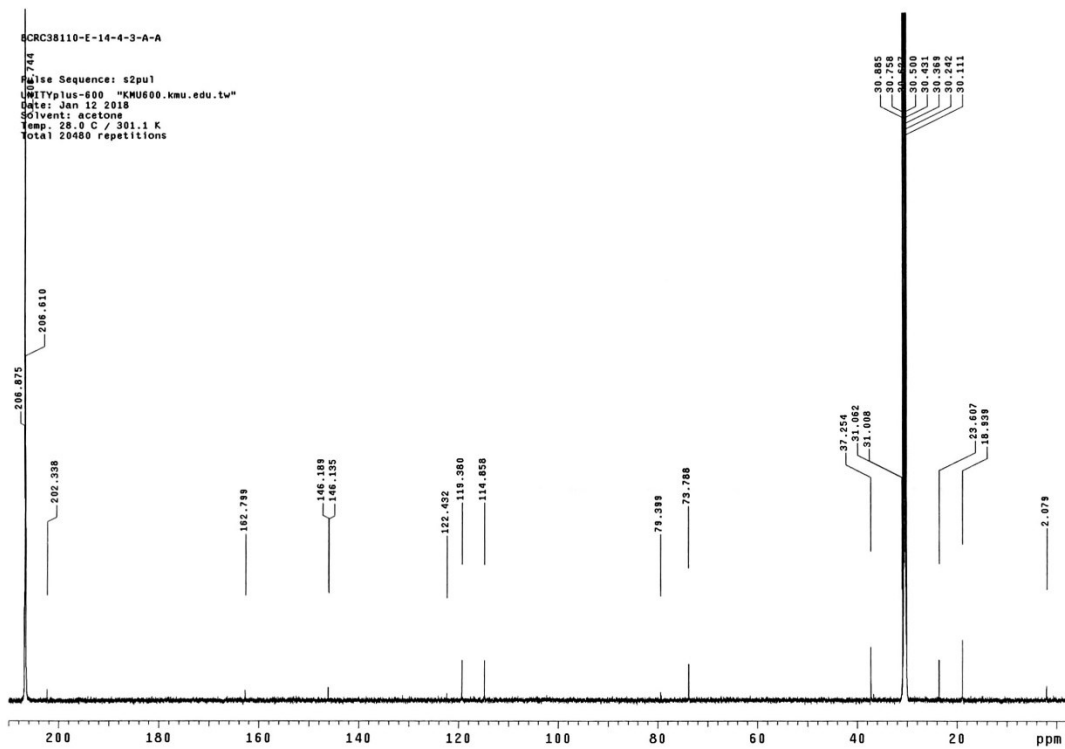

Figure S17.  $^{13}\text{C}$  NMR spectrum of monatetralone B (**3**) in  $\text{CDCl}_3$  at 125 MHz

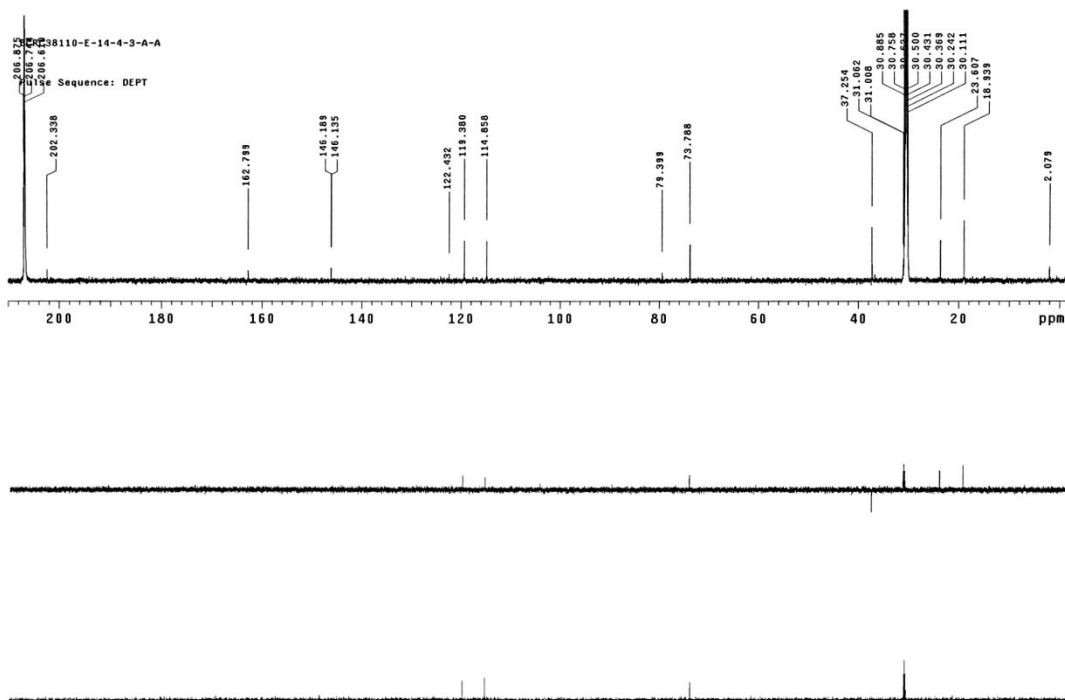

Figure S18. DEPT spectrum of monatetralone B (**3**)

BCRC38110-E-14-4-3-A-A

exp21 gCOSY

| SAMPLE         |               | FLAGS         |            |
|----------------|---------------|---------------|------------|
| date           | Jan 12 2018   | hs            | nn         |
| solvent        | acetone       | ssp1          | y          |
| sample         |               | hs1v1         | 5328       |
| ACQUISITION    |               | SPECIAL       |            |
| sw             | 9542.0        | temp          | 28.0       |
| at             | 0.150         | gain          | 54         |
| np             | 2862          | spin          | not used   |
| fb             | 4000          | F2            | PROCESSING |
| ss             | 32            | sb            | -0.075     |
| d1             | 1.000         | sbs           | not used   |
| nt             | 32            | fn            | 4096       |
| 2D ACQUISITION |               | F1 PROCESSING |            |
| sw1            | 9542.0        | sb1           | -0.017     |
| nt1            | 160           | sbs1          | not used   |
| d2             | PRESATURATION | procl         | 1p         |
|                |               | fn1           | 4096       |
| satmode        | n             | DISPLAY       |            |
| wet            | n             | sp            | -122.7     |
| TRANSMITTER    |               | wp            |            |
| tn             | H1            | sp1           | -122.7     |
| sfrq           | 597.283       | wp1           | 6088.5     |
| tof            | 597.3         | rf1           | 1185.0     |
| tpwr           | 58            | rfp           | 0          |
| pw             | 12.000        | rf11          | 1185.0     |
| GRADIENTS      |               | rfp1          |            |
| g2iv1E         | 4444          | PLOT          |            |
| g1E            | 0.001900      | wc            | 140.0      |
| Edratio        | 1.000         | sc            | 5.0        |
| gstab          | 0.000500      | wc2           | 140.0      |
| DECOUPLER      |               | sc2           | 5.0        |
| dn             | C13           | vs            | 2343       |
| dm             | nm            | th            | 8          |
|                | al            | cdc           | av         |

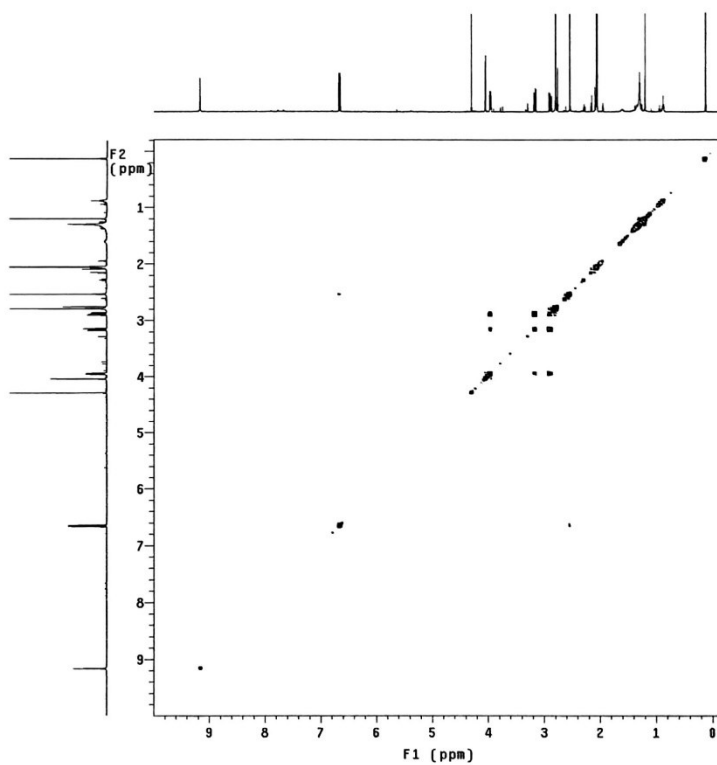

Figure S19. COSY spectrum of monatetralone B (3)

BCRC38110-E-14-4-3-A-A

Pulse Sequence: gHMBCAD

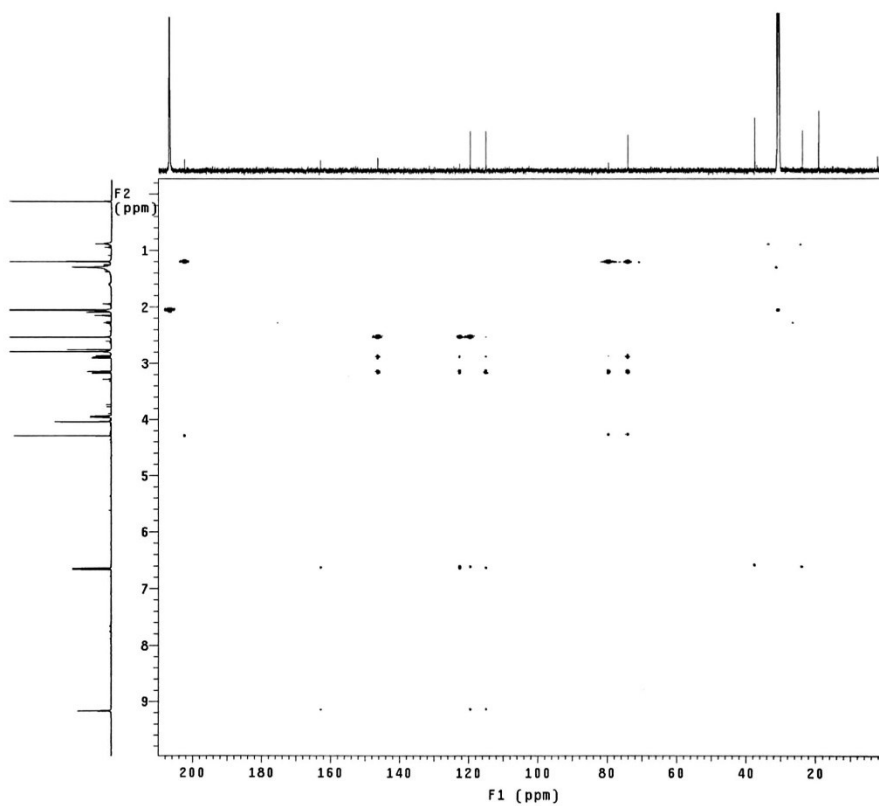

Figure S20. HMBC spectrum of monatetralone B (3)

BCRC38110-E-14-4-3-A-A

exp22 NOESY

```
SAMPLE          FLAGS
date Jan 12 2018 hs nn
solvent acetone sspu1 y
sample          PFG1g y
ACQUISITION    hsg1v1 5328
sv 9542.0      SPECIAL 28.0
at 0.150 temp 28.0
np 2862 gain 50
fb 4000 spin not used
ss 32 F2 PROCESSING
dl 1.000 gf 0.069
nt 32 gfs not used
2D ACQUISITION fn F1 PROCESSING 4096
sv1 9542.0      F1 0.015
nl 160 gf1 not used
TRANSMITTER H1 procl 1p
tn 597.283 fn1 4096
tof 597.3 sp DISPLAY -122.7
tpwr 38 wp 6089.5
pw 12.000 wp1 -122.7
mixN NOESY 0.600 wp1 6089.5
PRESATURATION rff1 1185.0
satmode n rfp 0
wet n rff1 1185.0
DECOUPLER n rfp1 0
dn C13 PLOT 140.0
dm nnn wc 5.0
sc 140.0
wc2 5.0
sc2 5.0
vs 2343
th 4
at cdc ph
```

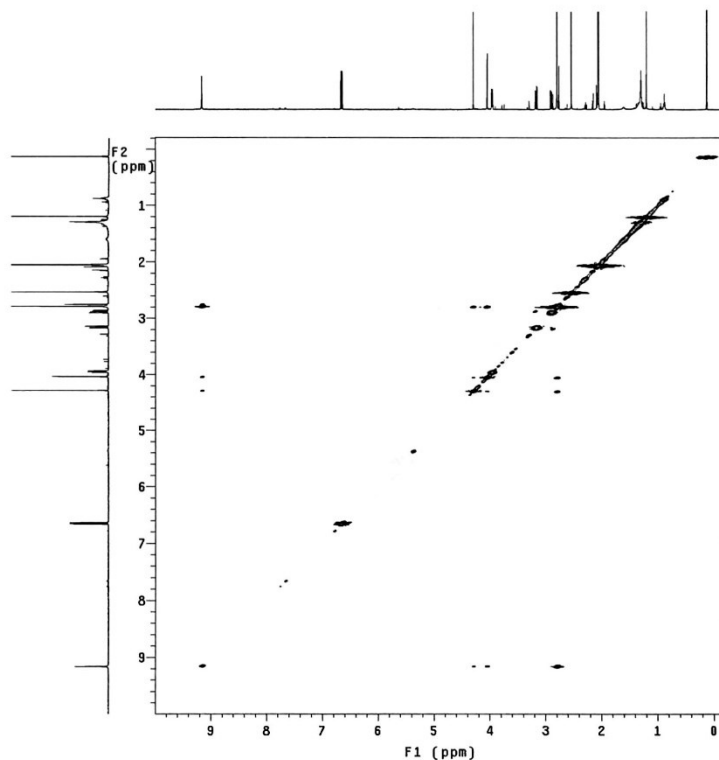

Figure S21. NOESY spectrum of monatetralone B (3)

### Mass Spectrum SmartFormula Report

#### Analysis Info

Analysis Name D:\Data\7\BCRC38110E143AA\_000004.d  
Method broadband first signal  
Sample Name BCRC38110-E-14-4-3-A-A  
Comment ESI Positive

2/14/2018 1:13:26 PM  
Operator: YU HSIAO-CHING  
Instrument: BRUKER FT-MS solarix

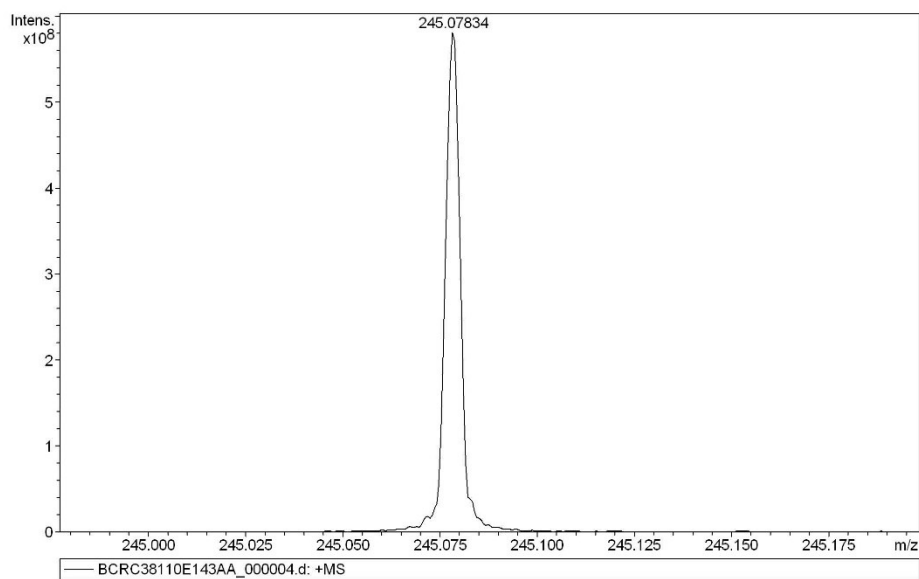

| Meas. m/z | # | Formula                                          | Score  | m/z       | err [mDa] | err [ppm] | mSigma | rdb | e <sup>-</sup> Conf | N-Rule |
|-----------|---|--------------------------------------------------|--------|-----------|-----------|-----------|--------|-----|---------------------|--------|
| 245.07834 | 1 | C <sub>12</sub> H <sub>14</sub> NaO <sub>4</sub> | 100.00 | 245.07843 | 0.09      | 0.37      | 9.1    | 5.5 | even                | ok     |

Figure S22. HRESIMS spectrum of monatetralone B (3)

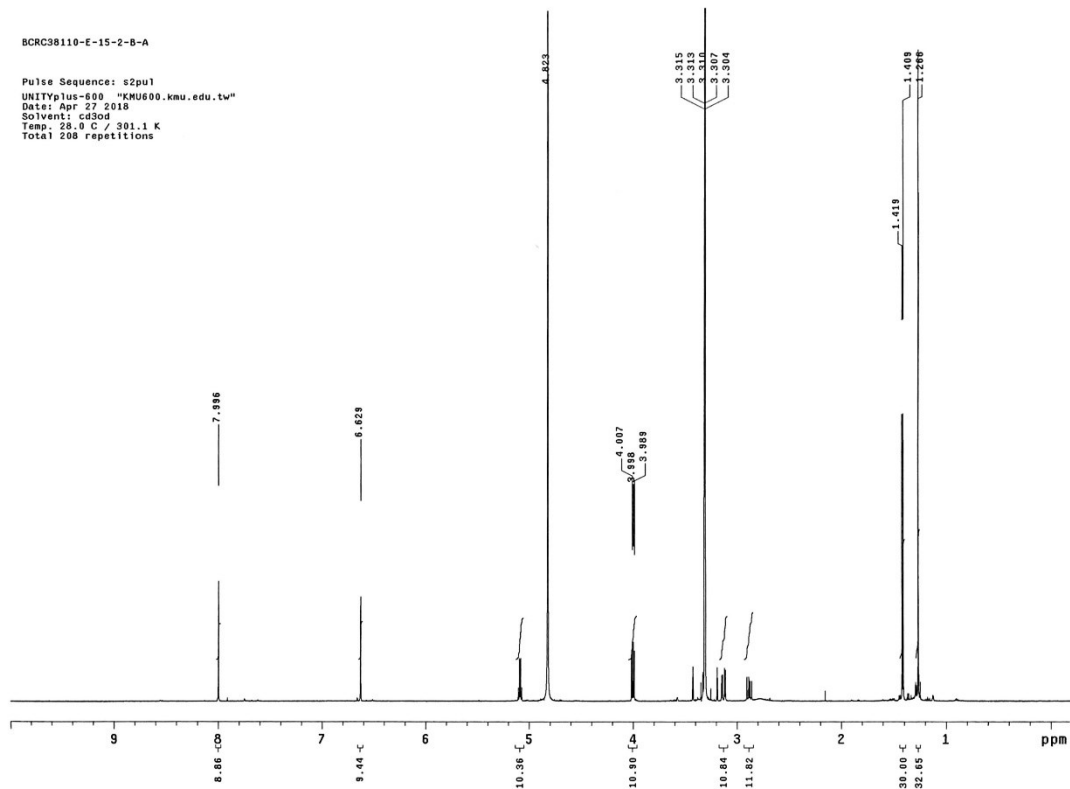

Figure S23.  $^1\text{H}$  NMR spectrum of monatetralone C (**4**) in  $\text{CD}_3\text{OD}$  at 600 MHz

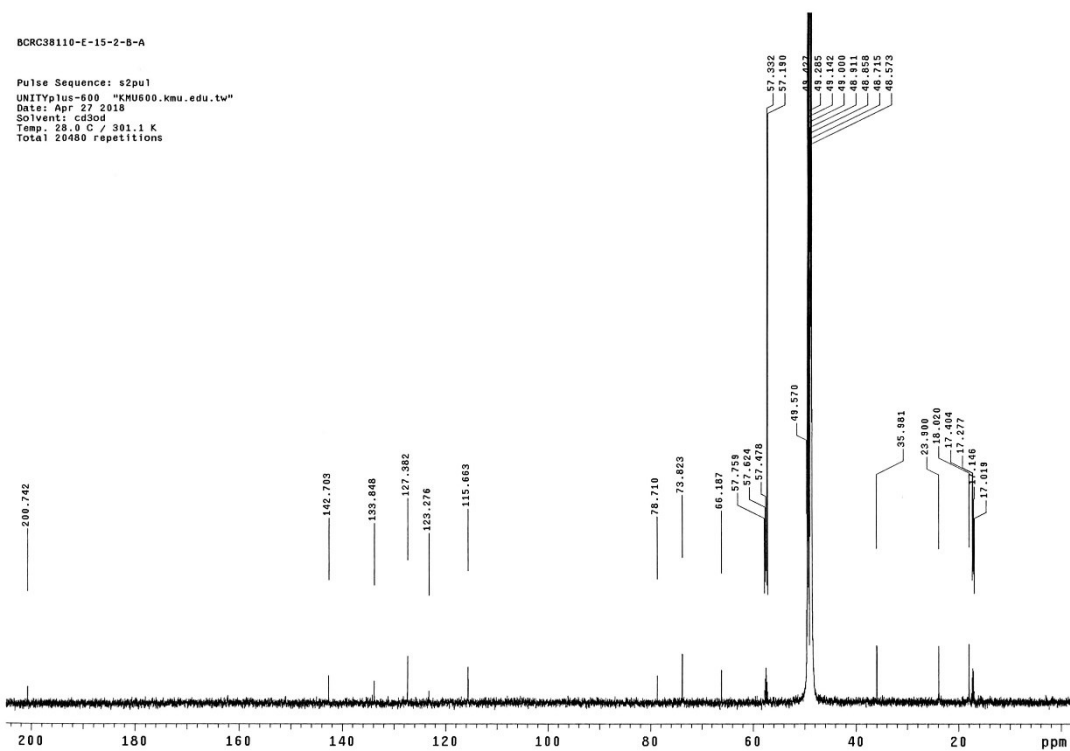

Figure S24.  $^{13}\text{C}$  NMR spectrum of monatetralone C (**4**) in  $\text{CD}_3\text{OD}$  at 125 MHz

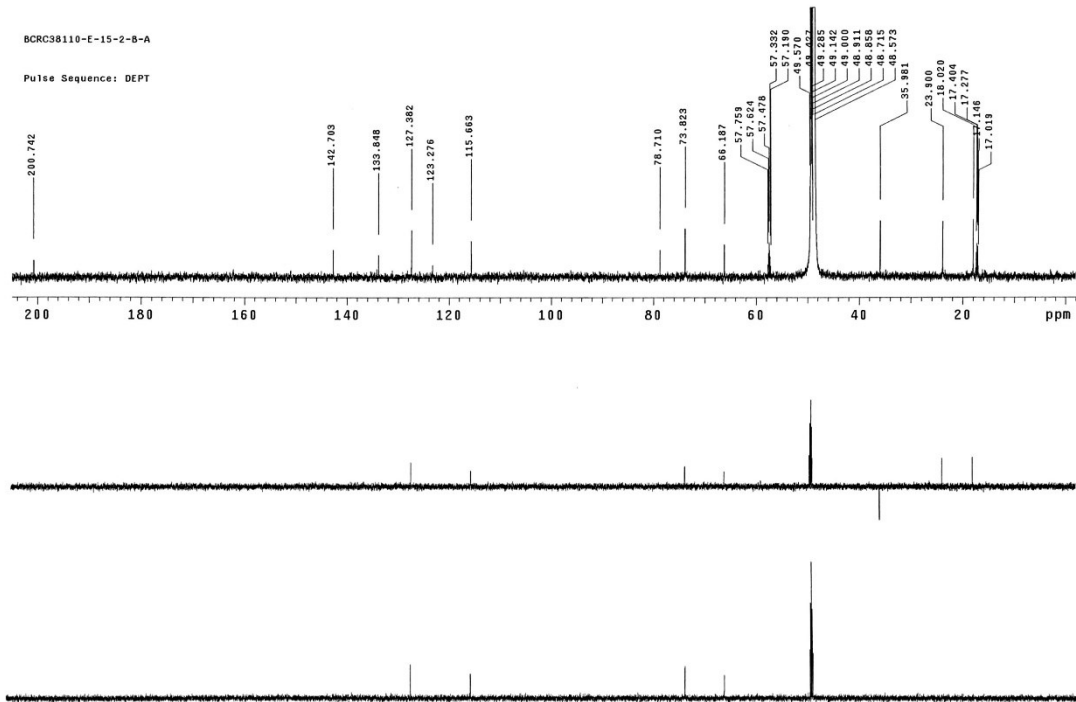

Figure S25. DEPT spectrum of monatetralone C (4)

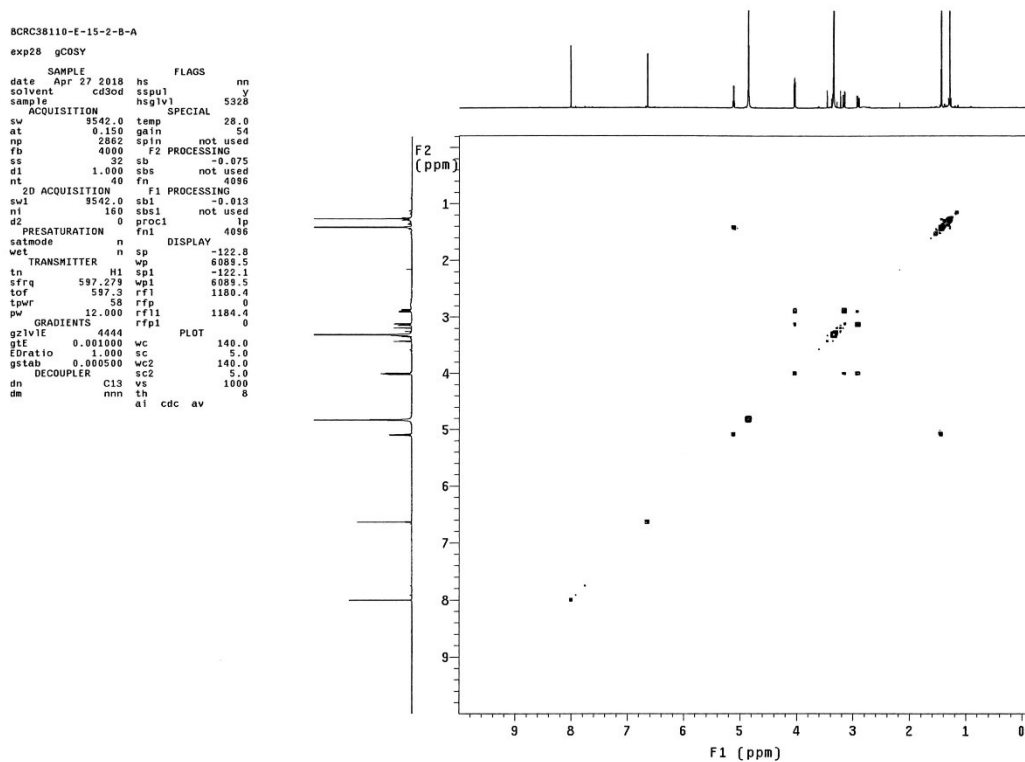

Figure S26. COSY spectrum of monatetralone C (4)



BCRC38110-E-15-2-B-A  
Pulse Sequence: gHMBCAD

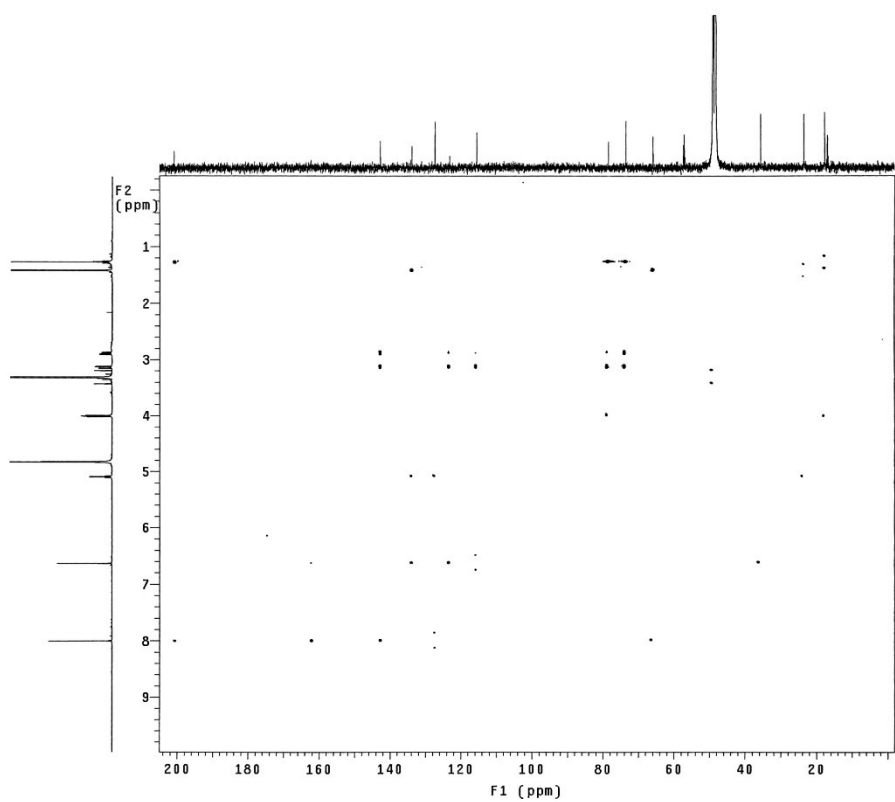

Figure S27. HMBC spectrum of monatetralone C (4)

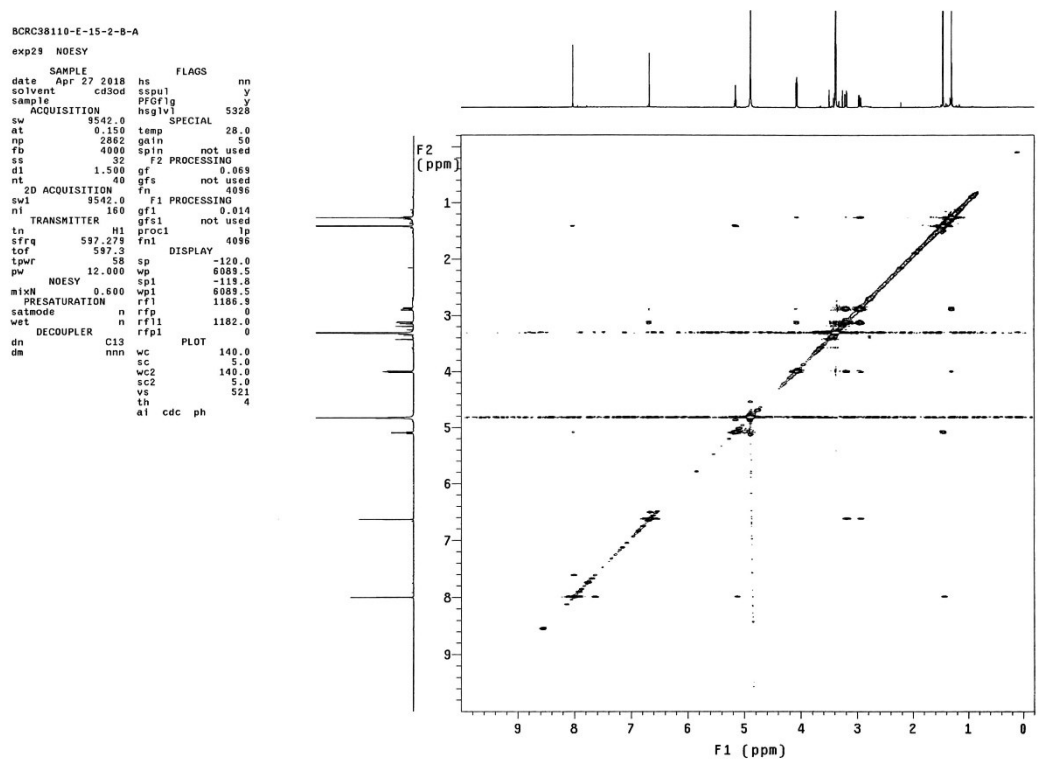

Figure S28. NOESY spectrum of monatetralone C (4)

## Mass Spectrum SmartFormula Report

### Analysis Info

Analysis Name D:\Data\7\BCRC38110E152BA\_000002.d  
Method broadband first signal  
Sample Name BCRC38110-E-15-2-B-A  
Comment ESI Positive

5/11/2018 3:20:47 PM  
Operator: YU HSIAO-CHING  
Instrument: BRUKER FT-MS solariX

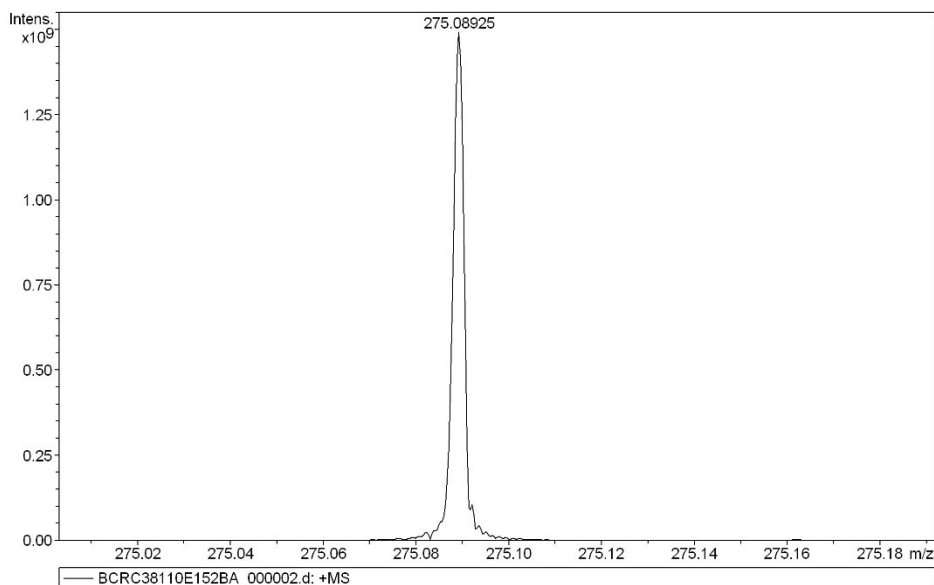

| Meas. m/z | # | Formula                                          | Score  | m/z       | err [mDa] | err [ppm] | mSigma | rdb | e <sup>-</sup> | Conf | N-Rule |
|-----------|---|--------------------------------------------------|--------|-----------|-----------|-----------|--------|-----|----------------|------|--------|
| 275.08925 | 1 | C <sub>13</sub> H <sub>16</sub> NaO <sub>5</sub> | 100.00 | 275.08899 | -0.26     | -0.94     | 8.0    | 5.5 | even           |      | ok     |

Figure S29. HRESIMS spectrum of monatetralone C (4)

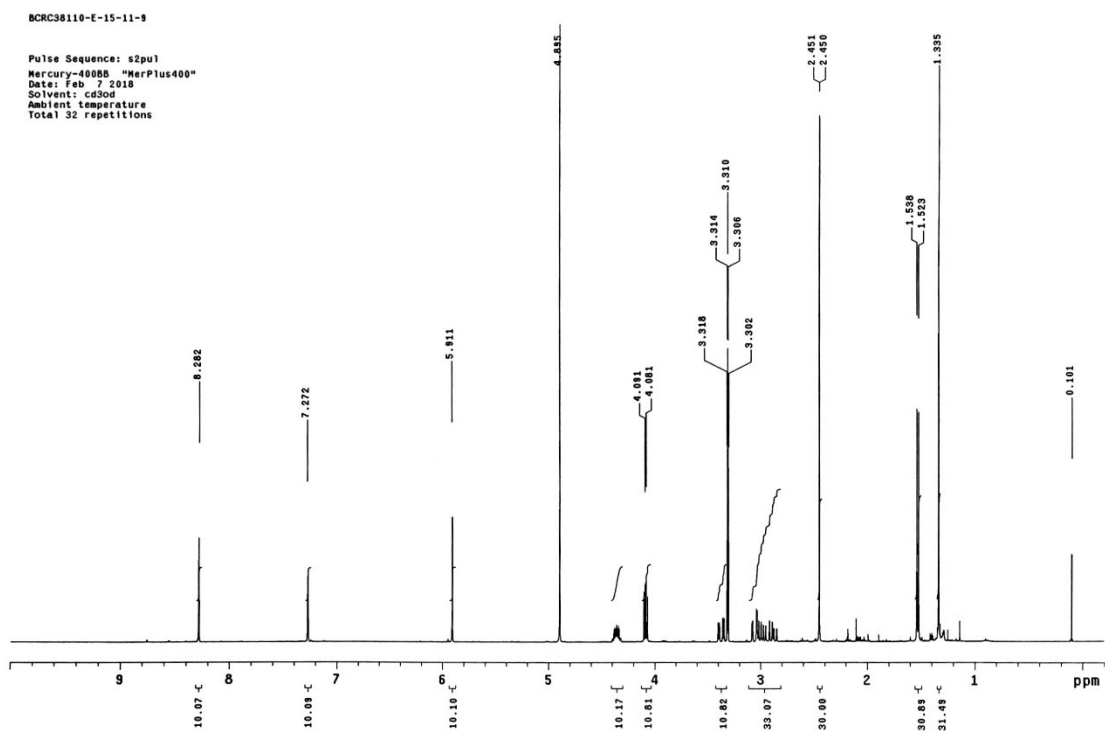

Figure S30. <sup>1</sup>H NMR spectrum of monatetralone D (5) in CD<sub>3</sub>OD at 400 MHz

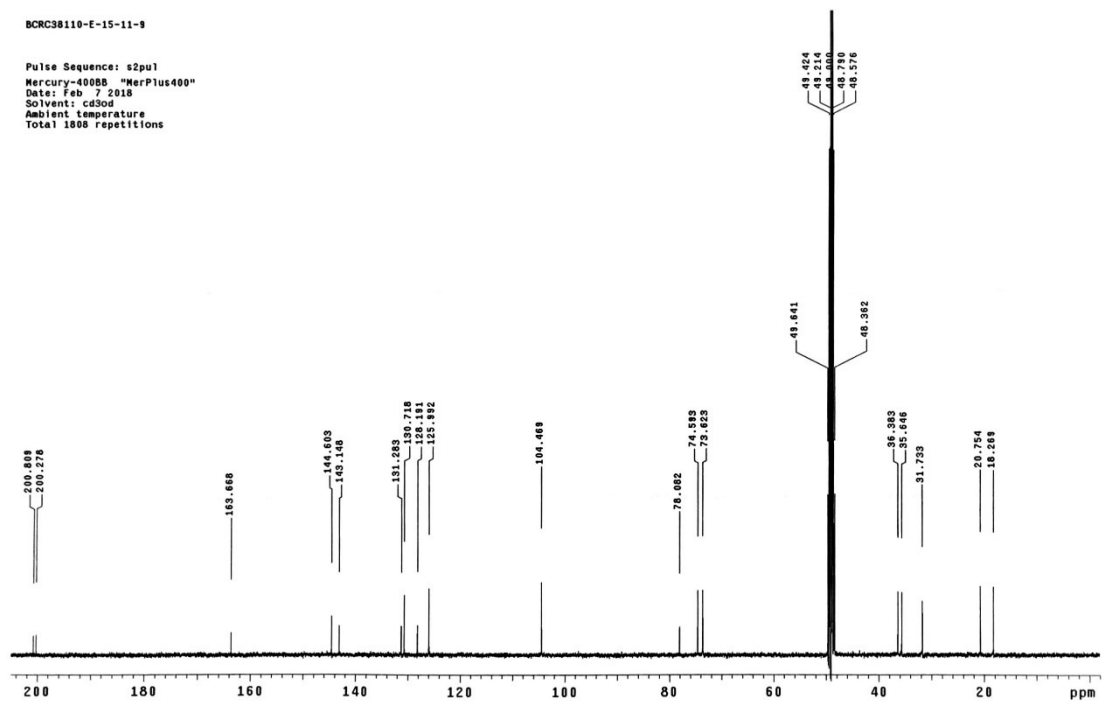

Figure S31.  $^{13}\text{C}$  NMR spectrum of monatetralone D (5) in  $\text{CD}_3\text{OD}$  at 100 MHz

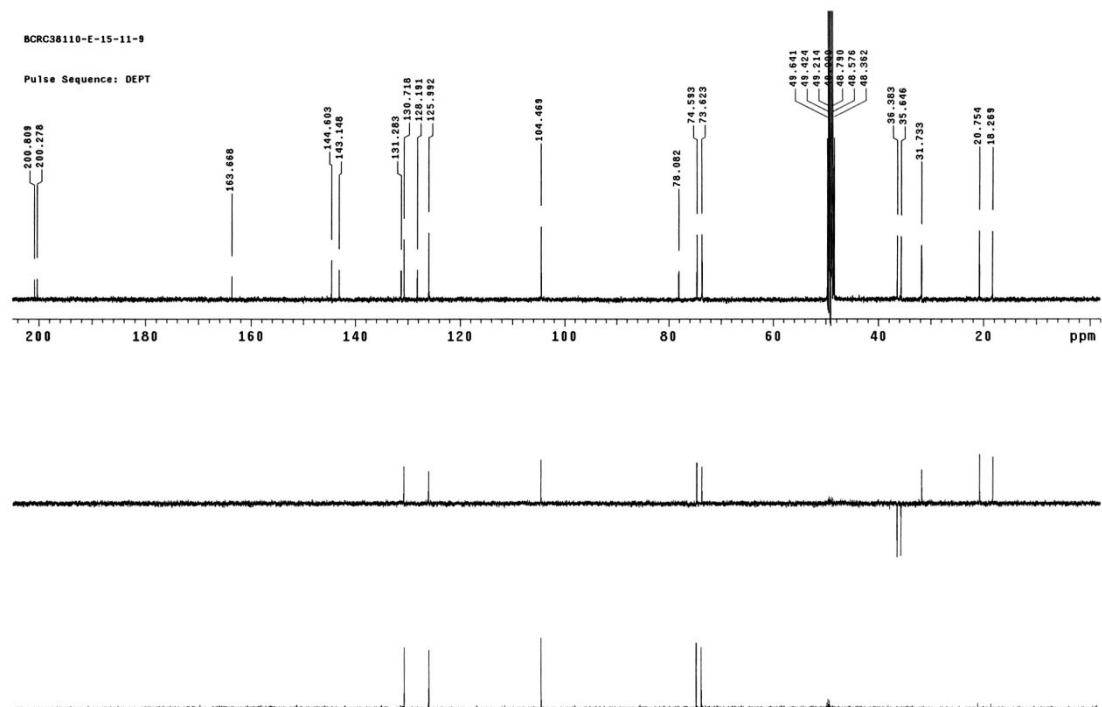

Figure S32. DEPT spectrum of monatetralone D (5)

BCRC38110-E-15-11-9  
exp28 gCOSY

| SAMPLE         |            | FLAGS  |               |
|----------------|------------|--------|---------------|
| date           | Feb 7 2018 | hs     | nn            |
| solvent        | cd3od      | ssu1   | y             |
| sample         |            | hsglv1 | 1224          |
| ACQUISITION    |            |        |               |
| sw             | 640.3      | temp   | not used      |
| at             | 0.150      | gain   | 30            |
| np             | 1320       | sp1n   | not used      |
| fb             | not used   | F2     | PROCESSING    |
| ss             | 32         | sb     | -0.075        |
| d1             | 1.000      | sbs    | not used      |
| nt             | 20         | fn     | 4086          |
| 2D ACQUISITION |            |        |               |
| sw1            | 640.3      | sb1    | -0.020        |
| nl             | 160        | sbs1   | not used      |
| d2             | 0          | procl  | 1p            |
| PRESATURATION  |            |        |               |
|                | fn1        |        | 4086          |
| TRANSMITTER    |            |        |               |
| satmode        | n          | sp     | DISPLAY -80.4 |
| wet            |            | wp     | 4081.5        |
| tn             | H1         | sp1    | -80.4         |
| sfrq           | 400.402    | wp1    | 4081.5        |
| tof            | 366.0      | rf1    | 800.3         |
| tpwr           | 61         | rpp    | 0             |
| pw             | 11.600     | rf11   | 800.3         |
| GRADIENTS      |            |        |               |
| gz1w1e         | 1028       |        | PLOT 0        |
| g1e            | 0.001000   | wc     | 140.0         |
| EDratio        | 1.000      | sc     | 5.0           |
| gstab          | 0.000500   | wc2    | 140.0         |
| DECOUPLER      |            | sc2    | 5.0           |
| dn             | C13        | vs     | 100           |
| dm             | nmn        | th     | 8             |
|                |            | al     | av            |

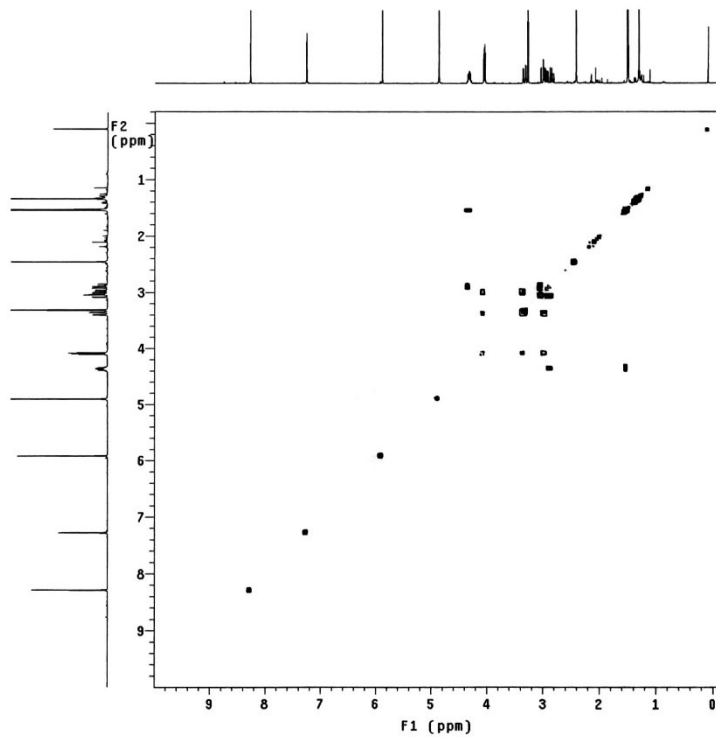

Figure S33. COSY spectrum of monatetralone D (5)

Pulse Sequence: gHMBC

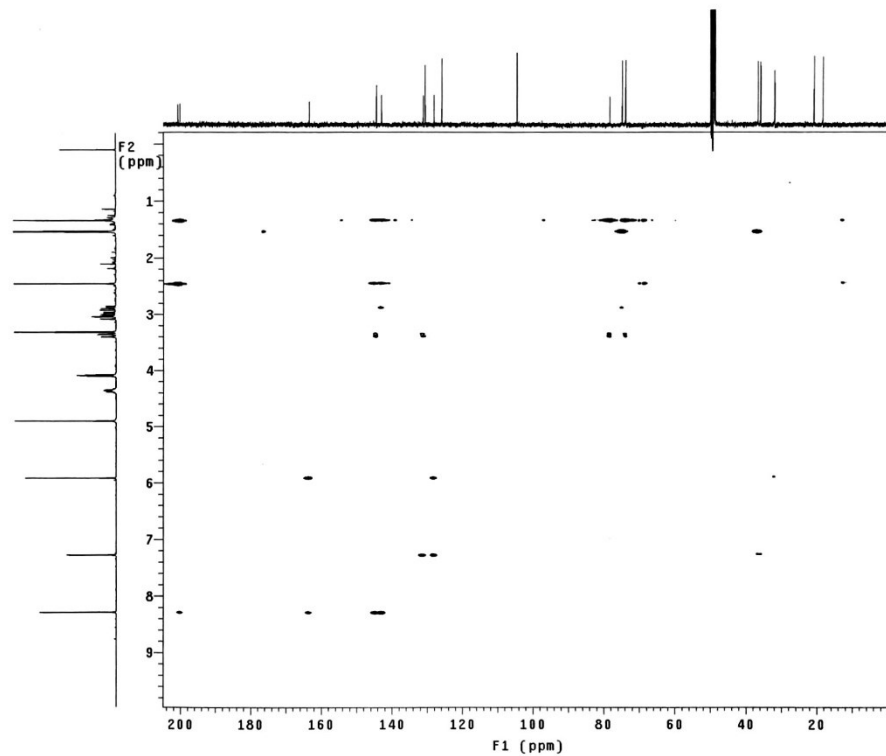

Figure S34. HMBC spectrum of monatetralone D (5)

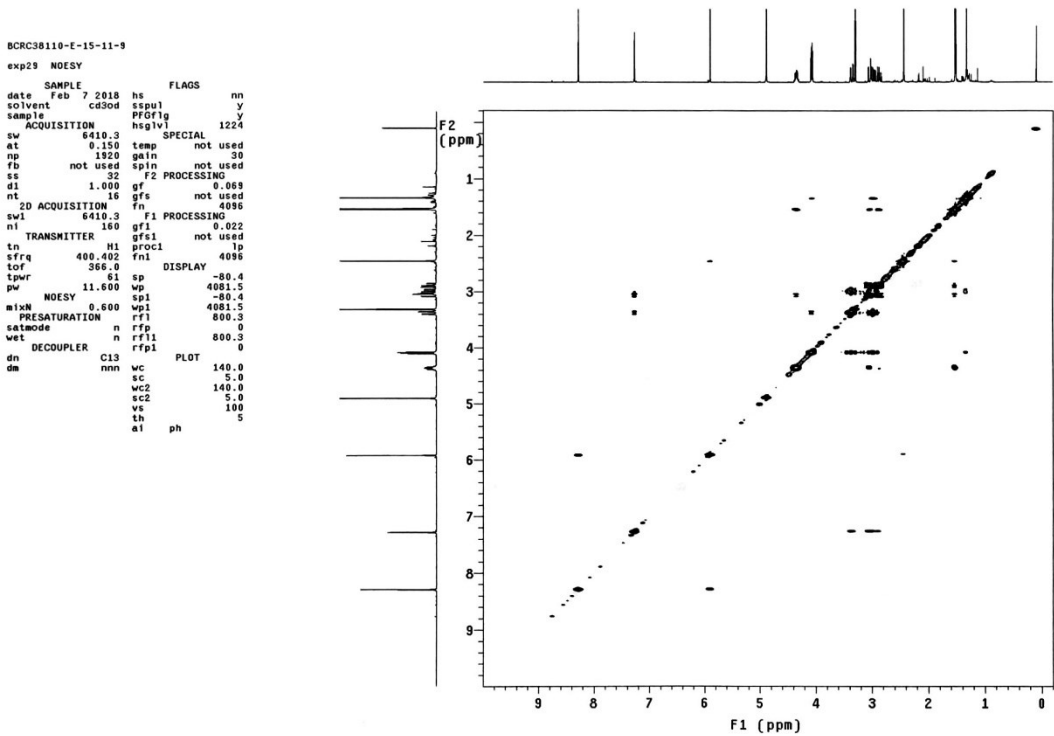

Figure S35. NOESY spectrum of monatetralone D (5)

### Mass Spectrum SmartFormula Report

**Analysis Info**

|               |                                    |                                  |
|---------------|------------------------------------|----------------------------------|
| Analysis Name | D:\Data\7\BCRC38110E15119_000002.d | 3/12/2018 2:45:16 PM             |
| Method        | broadband first signal             | Operator: YU HSIAO-CHING         |
| Sample Name   | BCRC48110-E-15-11-9                | Instrument: BRUKER FT-MS solariX |
| Comment       | ESI Positive                       |                                  |

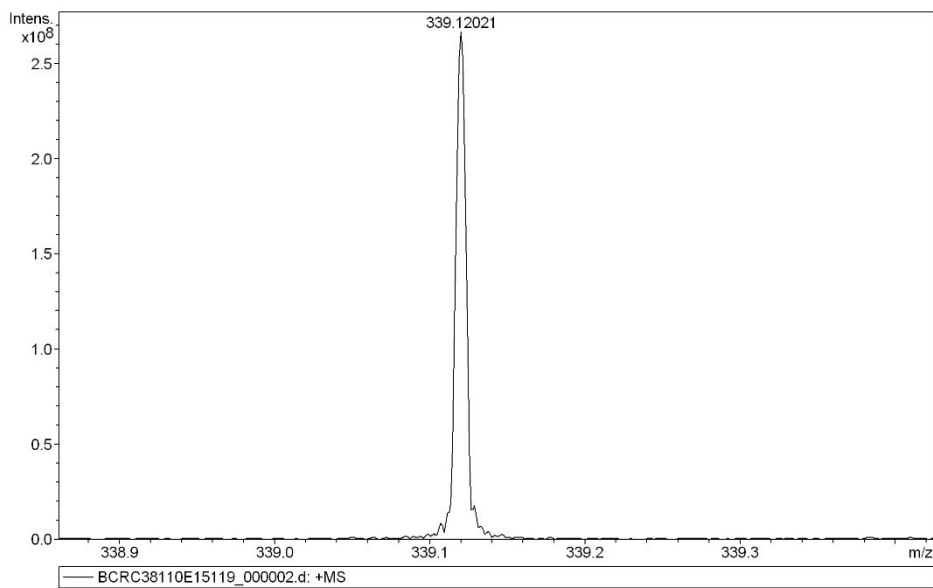

| Meas. m/z | # | Formula                                          | Score  | m/z       | err [mDa] | err [ppm] | mSigma | rdb | e <sup>-</sup> Conf | N-Rule |
|-----------|---|--------------------------------------------------|--------|-----------|-----------|-----------|--------|-----|---------------------|--------|
| 339.12021 | 1 | C <sub>18</sub> H <sub>20</sub> NaO <sub>5</sub> | 100.00 | 339.12029 | 0.08      | 0.25      | 6.0    | 8.5 | even                | ok     |

Figure S36. HRESIMS spectrum of monatetralone D (5)

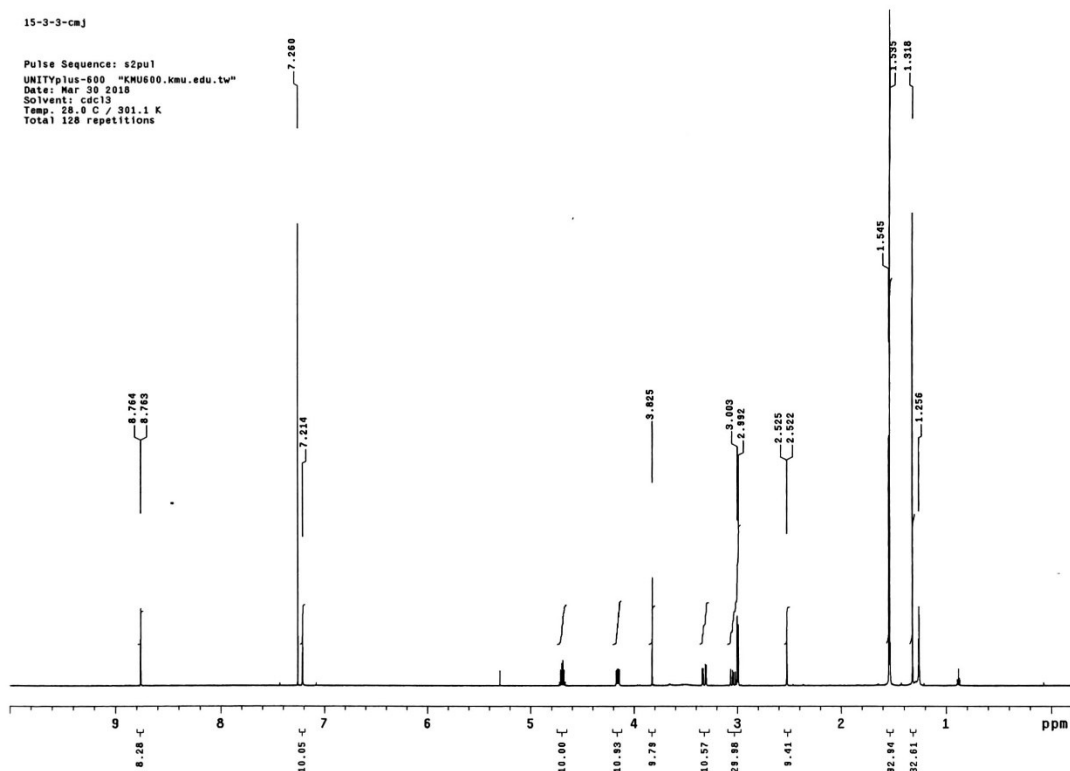

Figure S37.  $^1\text{H}$  NMR spectrum of monatetralone E (**6**) in  $\text{CDCl}_3$  at 600 MHz

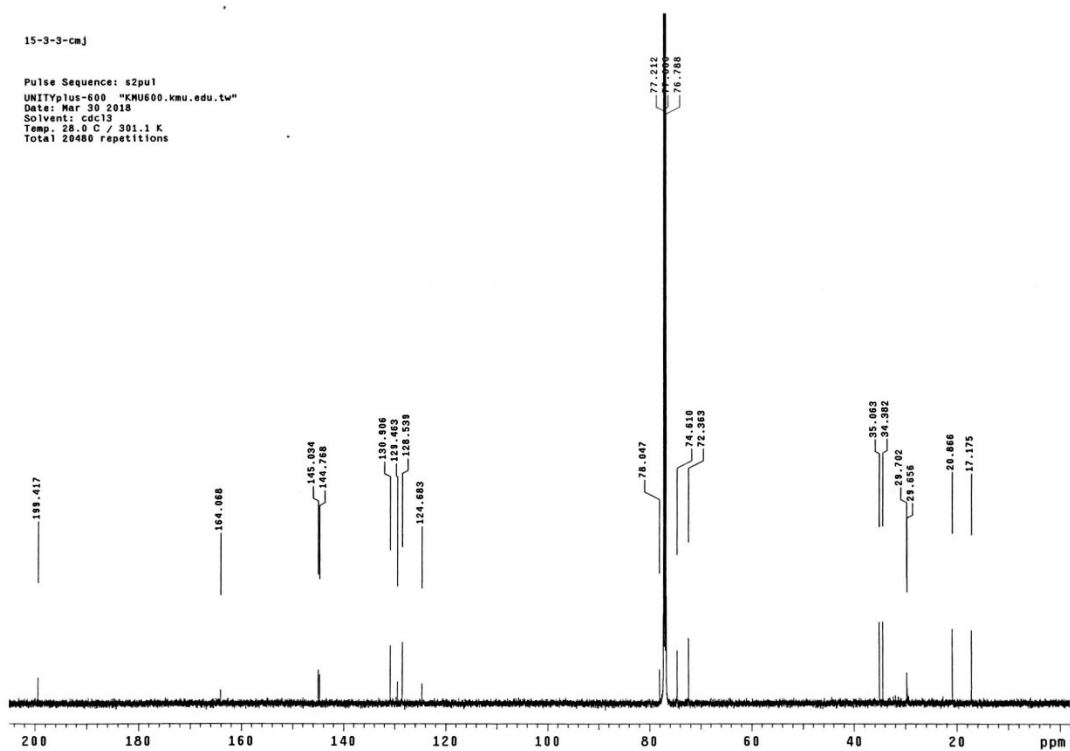

Figure S38.  $^{13}\text{C}$  NMR spectrum of monatetralone E (**6**) in  $\text{CDCl}_3$  at 125 MHz

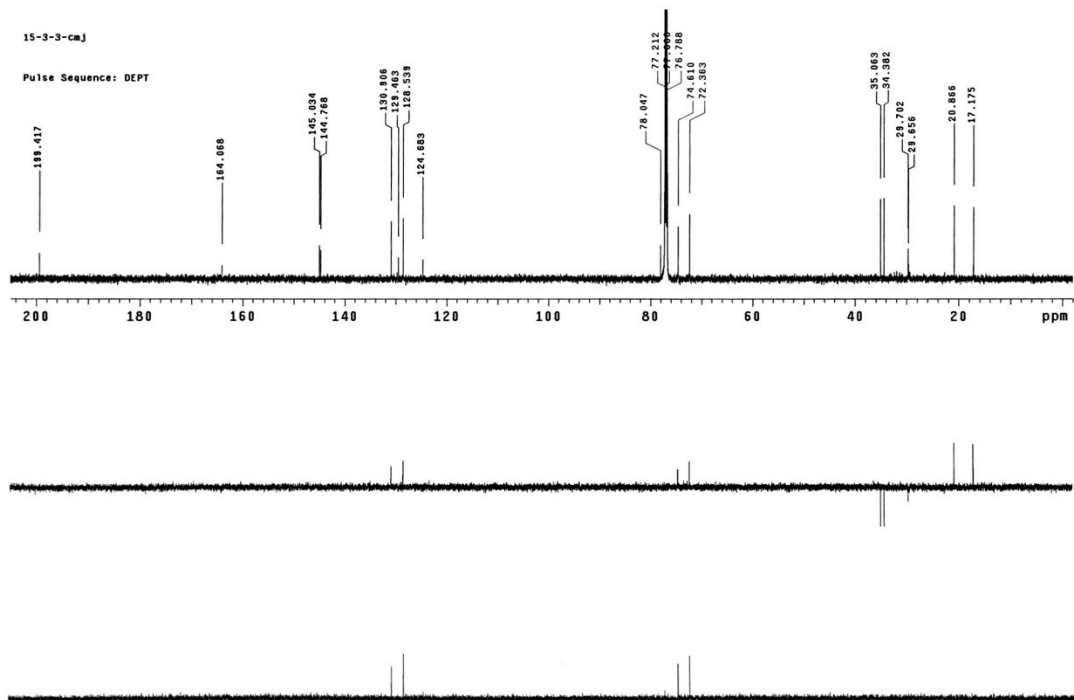

Figure S39. DEPT spectrum of monatetralone E (6)

15-3-3-cmJ

exp14 gCOSY

| SAMPLE         |             | FLAGS         |            |
|----------------|-------------|---------------|------------|
| date           | Mar 30 2018 | hs            | nm         |
| solvent        | cdc13       | sspu          | y          |
| sample         | hsjw1       |               | 5328       |
| ACQUISITION    |             | SPECIAL       |            |
| sv             | 9542.0      | temp          | 25.0       |
| at             | 0.150       | gain          | 60         |
| np             | 2862        | spin          | 0          |
| fb             | 4000        | F2            | PROCESSING |
| ss             | 32          | sb            | -0.075     |
| d1             | 1.000       | sbs           | not used   |
| nt             | 40          | fn            | 4096       |
| 2D ACQUISITION |             | F1 PROCESSING |            |
| sw1            | 9542.0      | sb1           | -0.013     |
| nt1            | 160         | sb1           | not used   |
| d2             | 0           | procl         | 1p         |
| PRESATURATION  |             | n             |            |
| satmode        | n           | fn1           | 4096       |
| wt             | TRANSMITTER | n             | sp         |
| tn             | M1          | wp            | 6089.5     |
| sfrq           | 597.277     | sp1           | -121.1     |
| tof            | 597.3       | rf1           | 1187.5     |
| tpwr           | 58          | rff           | 0          |
| pw             | 12.000      | rf1           | 1187.4     |
| GRADIENTS      |             | PLOT          |            |
| g2lvie         | 4444        | wc            | 140.0      |
| gc             | 0.001000    | sc            | 5.0        |
| Edratio        | 1.000       | wc2           | 140.0      |
| gsfab          | 0.000500    | sc2           | 5.0        |
| DECOUPLER      |             | vs            |            |
| dn             | C13         | th            | 165        |
| dm             | nnn         | ai            | cdc av     |
|                |             |               | 7          |

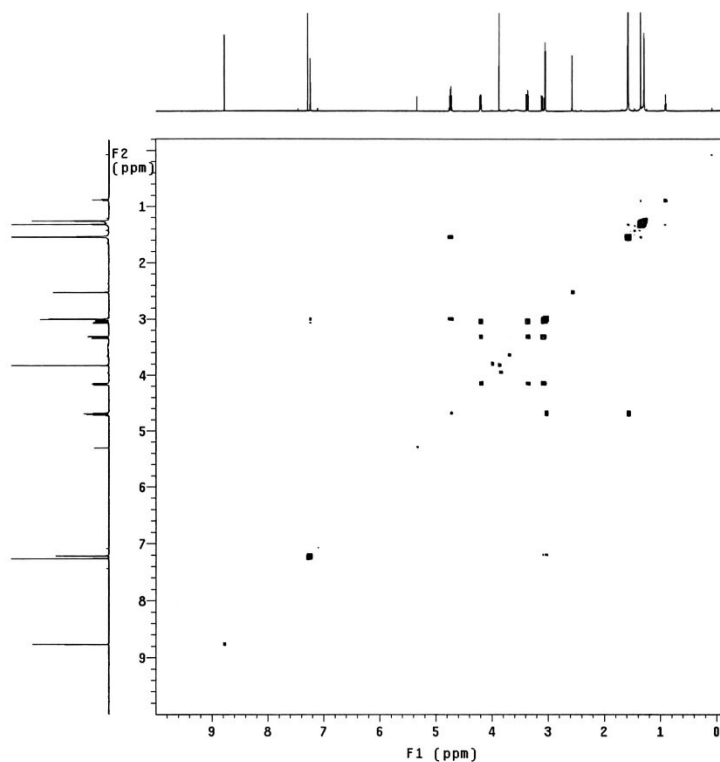

Figure S40. COSY spectrum of monatetralone E (6)

15-3-3-cmj  
Pulse Sequence: gHMBCAD

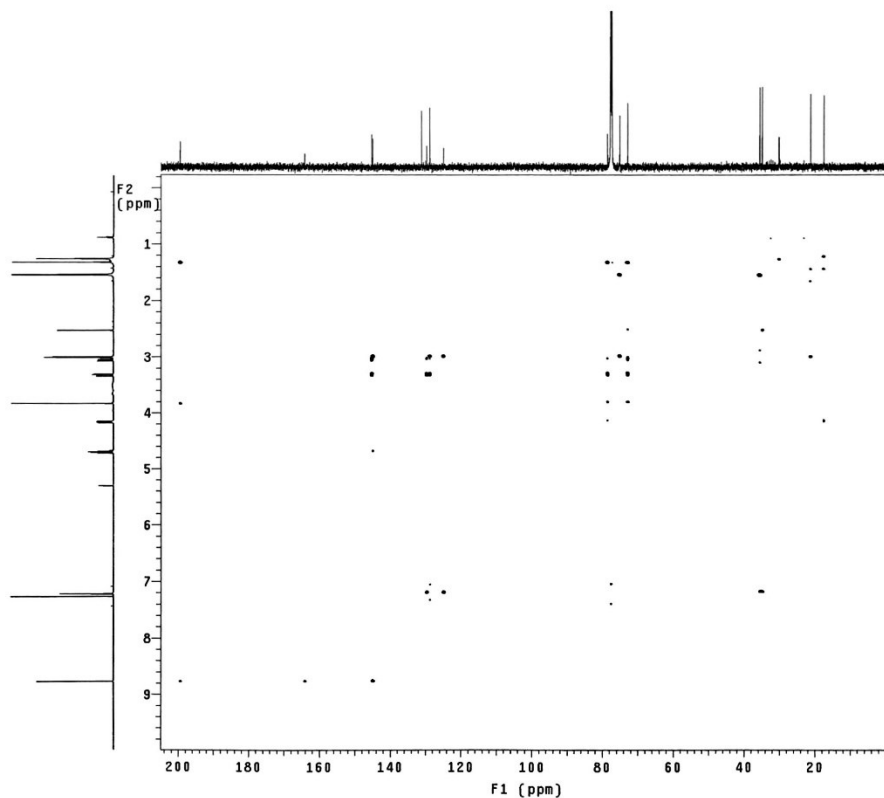

Figure S41. HMBC spectrum of monatetralone E (6)

```

15-3-3-cmj
exp15 NOESY
SAMPLE FLAGS
date Mar 30 2018 hs nn
solvent cdc13 sspu1 y
sample PFGlg y
ACQUISITION hsglv1 5328
sv 9542.0 SPECIAL
at 0.150 temp 28.0
np 2862 gain 52
fs 4000 spin 0
ss 32 F2 PROCESSING
dl 1.500 gf 0.969
nt 40 gfs not used
2D ACQUISITION fn 4096
sv1 9542.0 F1 PROCESSING
n1 160 gf1 0.015
tn TRANSMITTER H1 gfs1 not used
sfrq 597.277 fn1 1p
tof 597.3 DISPLAY -122.0
tpwr 58 sp 6089.5
pw 12.000 wp -121.1
mixN NOESY wp1 6089.5
PRESATURATION rf1 1193.6
satmode n rfp 0
wet n rf11 1192.7
dn DECOUPLER rfp1 0
dm C13 PLOT 140.0
nnn wc 5.0
sc 140.0
sc2 5.0
vs 1172
th 4
a1 cdc ph

```

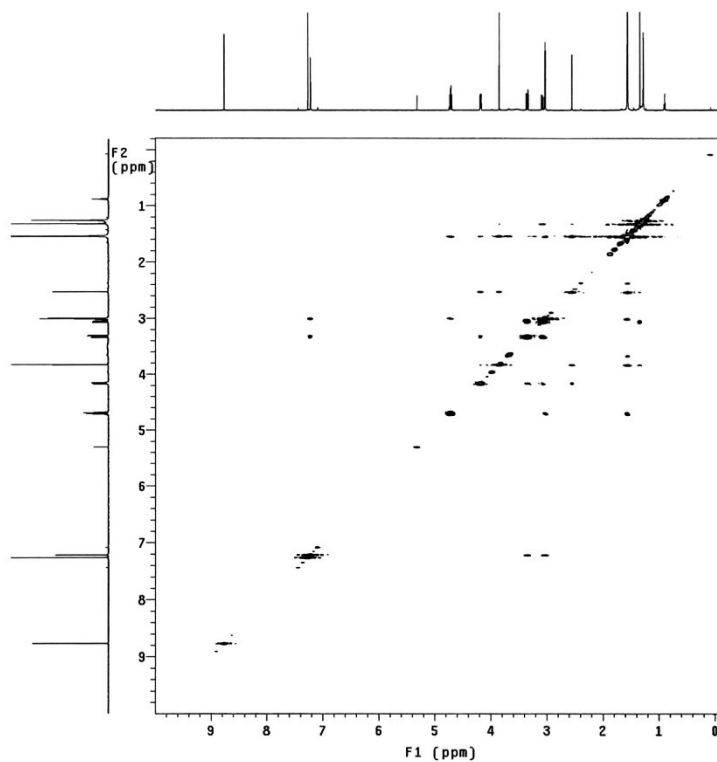

Figure S42. NOESY spectrum of monatetralone E (6)



## Mass Spectrum SmartFormula Report

### Analysis Info

Analysis Name D:\Data\7\BCRC38110E1533\_000001.d  
Method broadband first signal  
Sample Name BCRC38110-E-15-3-3  
Comment ESI Positive

5/11/2018 4:18:05 PM  
Operator: YU HSIAO-CHING  
Instrument: BRUKER FT-MS solariX

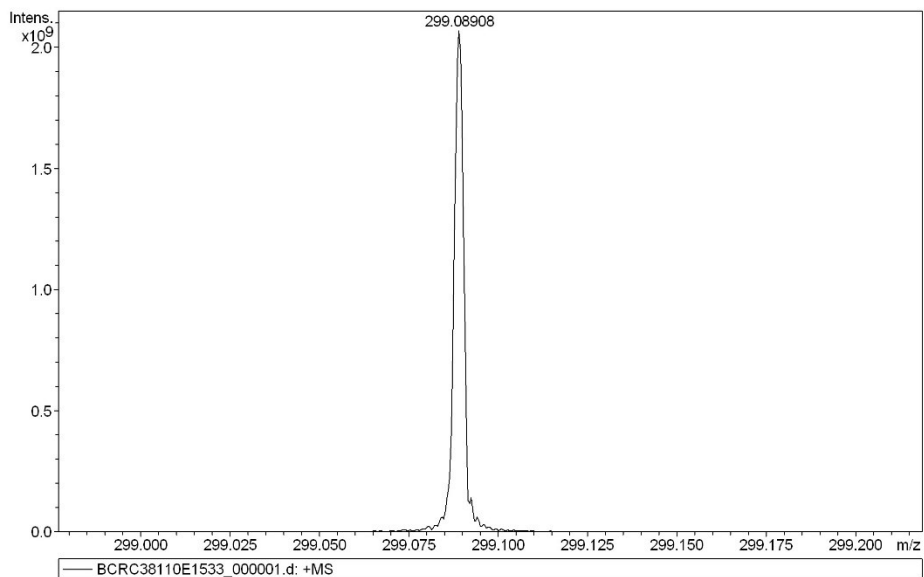

| Meas. m/z | # | Formula          | Score  | m/z       | err [mDa] | err [ppm] | mSigma | rdb | e <sup>-</sup> Conf | N-Rule |
|-----------|---|------------------|--------|-----------|-----------|-----------|--------|-----|---------------------|--------|
| 299.08908 | 1 | C 15 H 16 Na O 5 | 100.00 | 299.08899 | -0.09     | -0.30     | 5.8    | 7.5 | even                | ok     |

Figure S43. HRESIMS spectrum of monatetralone E (6)

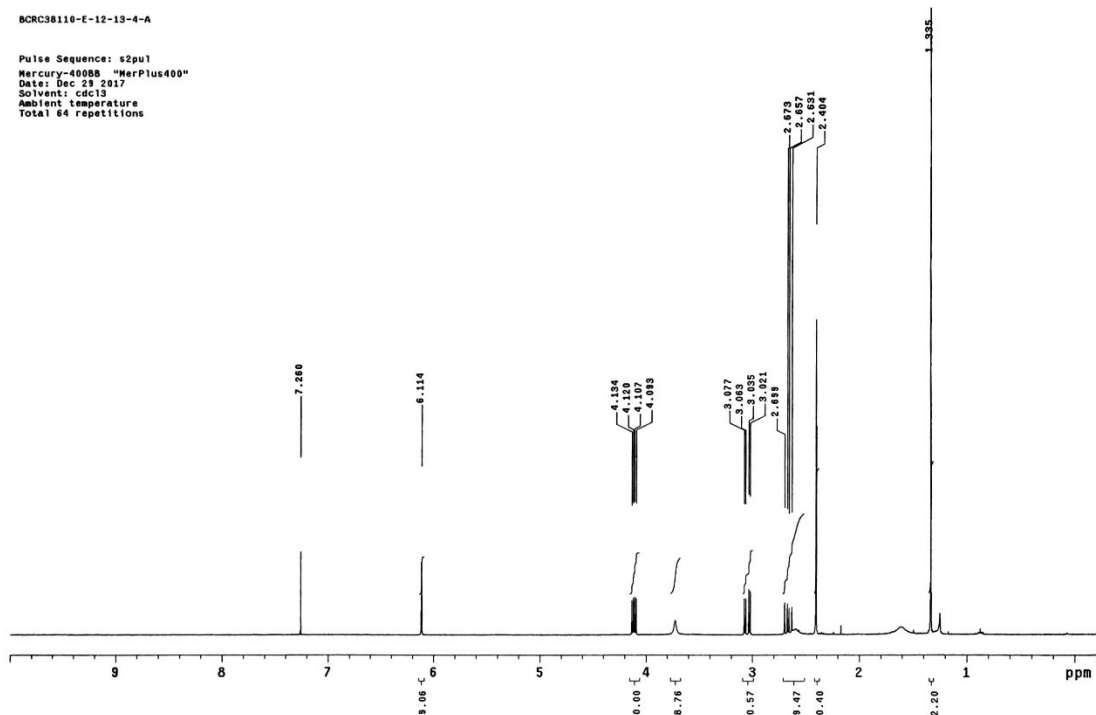

Figure S44. <sup>1</sup>H NMR spectrum of monabenzofuranone (7) in CDCl<sub>3</sub> at 400 MHz

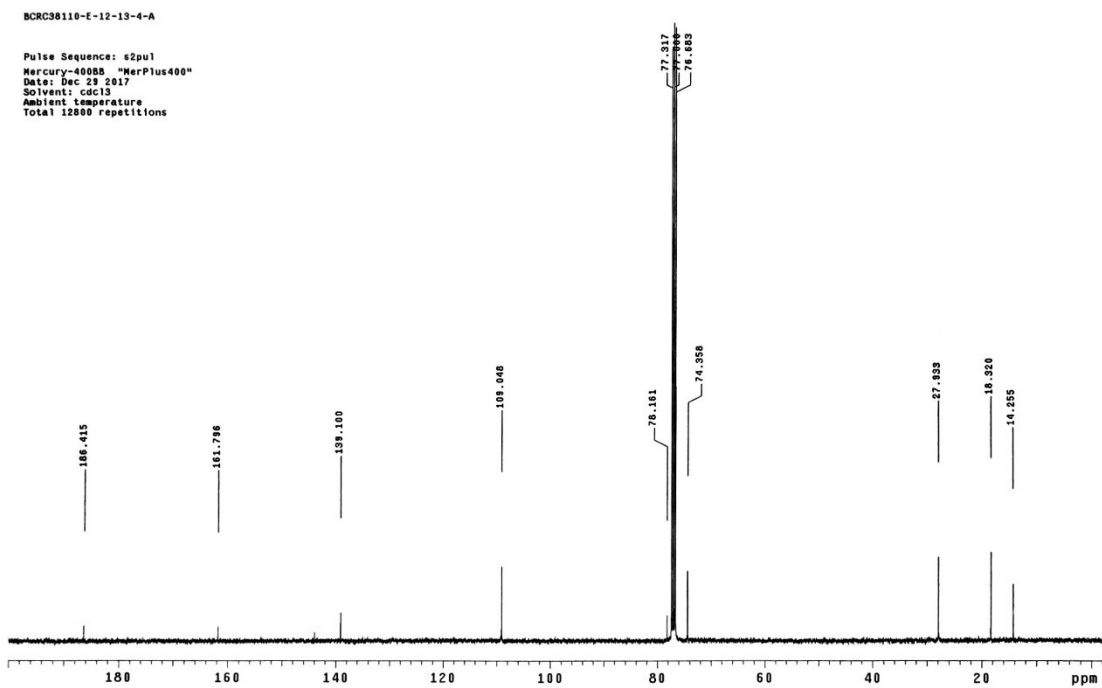

Figure S45.  $^{13}\text{C}$  NMR spectrum of monabenzofuranone (**7**) in  $\text{CDCl}_3$  at 100 MHz

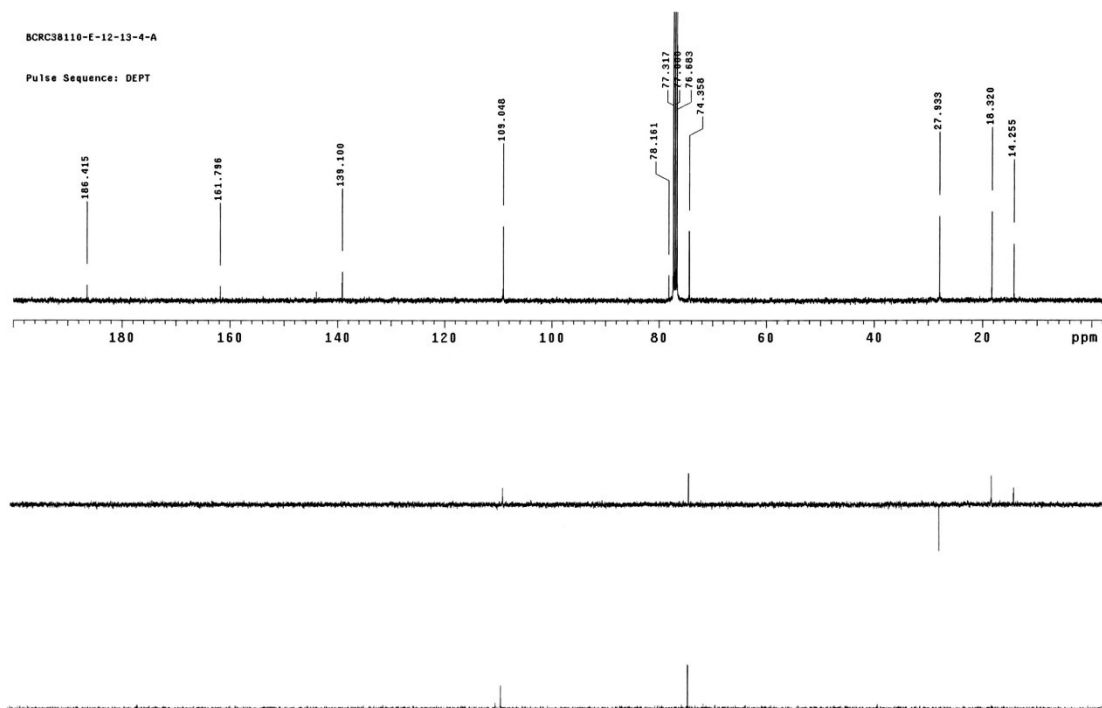

Figure S46. DEPT spectrum of monabenzofuranone (**7**)

BCRC38110-E-12-13-4-A  
exp14 gCOSY

```
SAMPLE          FLAGS
date   Dec 28 2017   hs      nn
solvent cdc13       spul    y
sample  hg1v1       1224

ACQUISITION     SPECIAL
sw       5410.3    temp    not used
at       0.150    gain    36
np       1920     spin    not used
fb       not used  f2     PROCESSING
ss       32       sb      -0.075
d1       1.000    sb1    not used
nt       32       fr      4936

2D ACQUISITION  F1 PROCESSING
sw1      5410.3    sb1    -0.025
n1       160     sb1    not used
d2       0       procl  lp
PRESATURATION  fn1    DISPLAY 4936
ratmode   n       sp      -82.6
wet       n       wp      4081.5
TRANSMITTER H1    sp1    -82.6
sfreq     400.401  wp1    4081.5
tof       366.0    rf1    802.5
tpwr     61       rfp    0
pw       11.600   rfp1   0
GRADIENTS
gzlvie    1028    PL0T
gtf       0.001000  wc     140.0
EDratio   1.000    sc     5.0
gstab     0.000500  wc2    140.0
DECOUPLER C13   vs     150
dm        nm    th     8
          a1    av     0
```

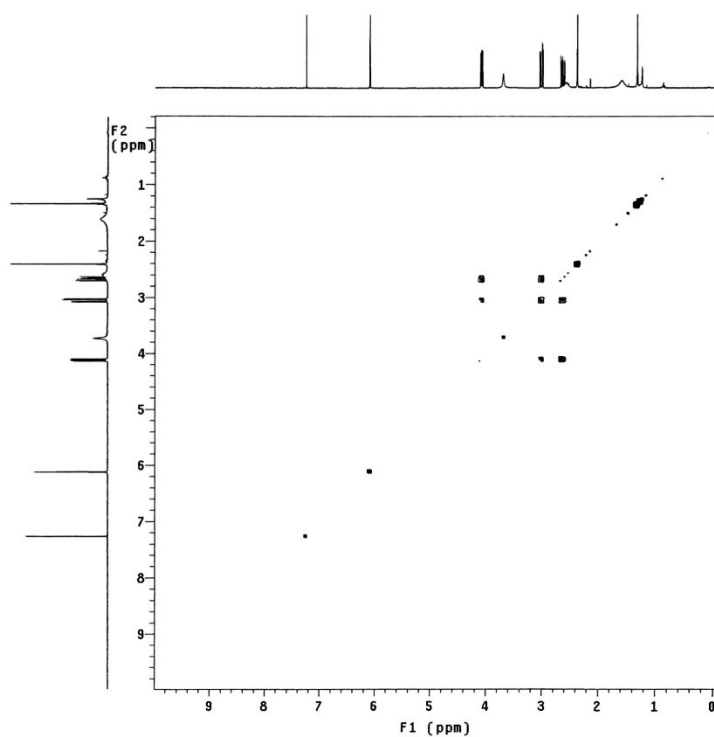

Figure S47. COSY spectrum of monabenzofuranone (7)

Pulse Sequence: gHMBC

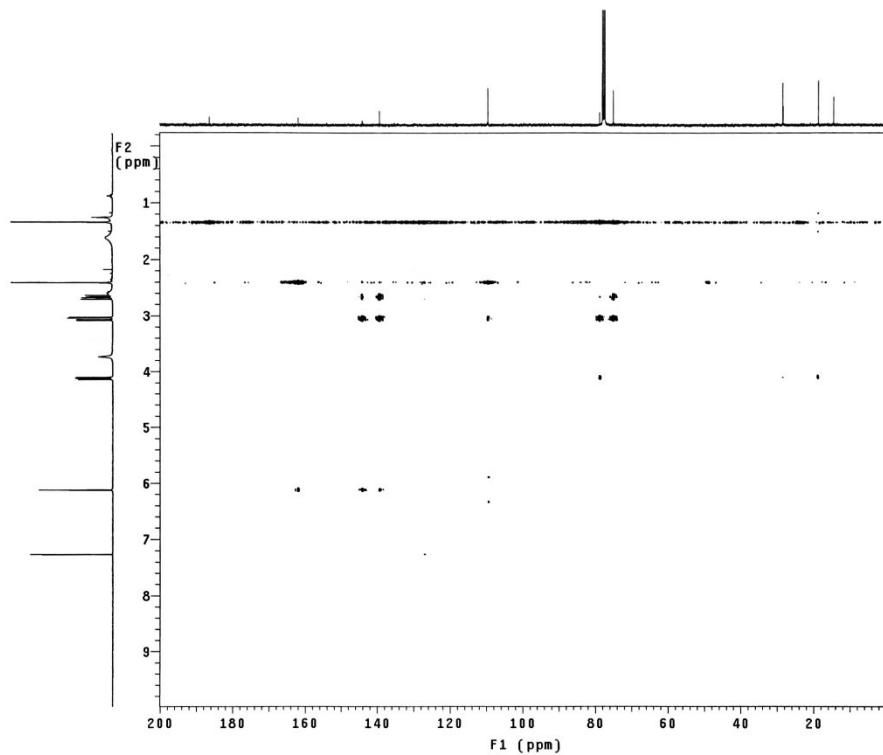

Figure S48. HMBC spectrum of monabenzofuranone (7)

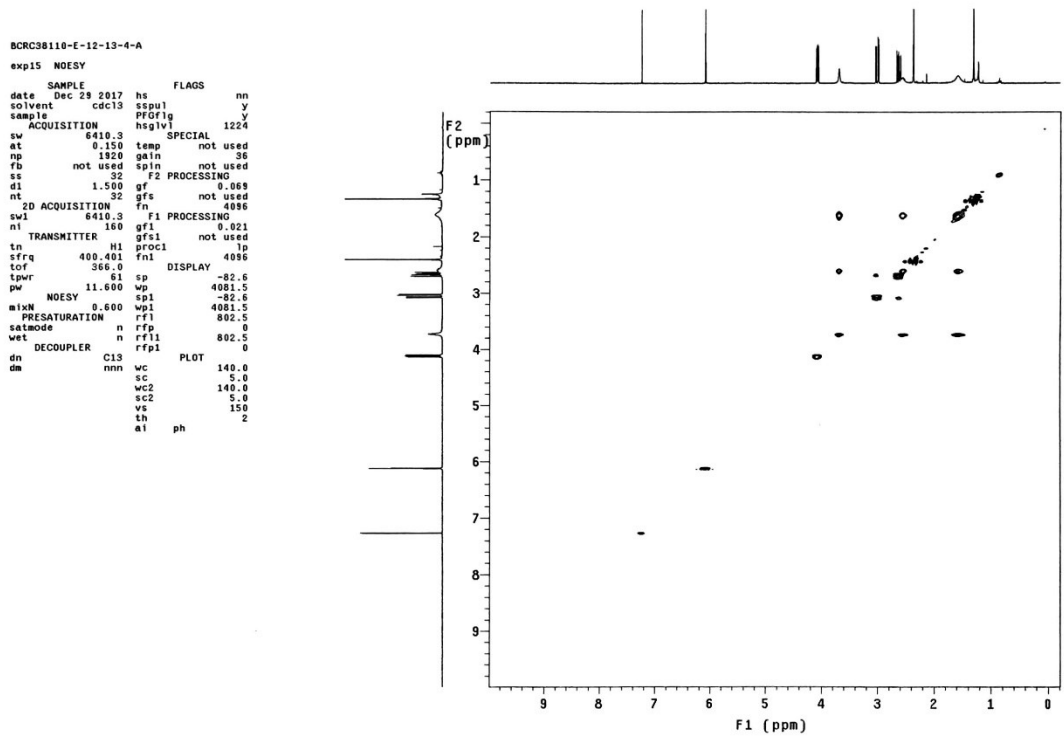

Figure S49. NOESY spectrum of monabenzofuranone (7)

### Mass Spectrum SmartFormula Report

#### Analysis Info

Analysis Name D:\Data\7\BCRC38110E12134A\_000003.d  
Method broadband first signal  
Sample Name BCRC38110-E-12-13-4-A  
Comment ESI Positive

2/14/2018 12:51:53 PM  
Operator: YU HSIAO-CHING  
Instrument: BRUKER FT-MS solarix

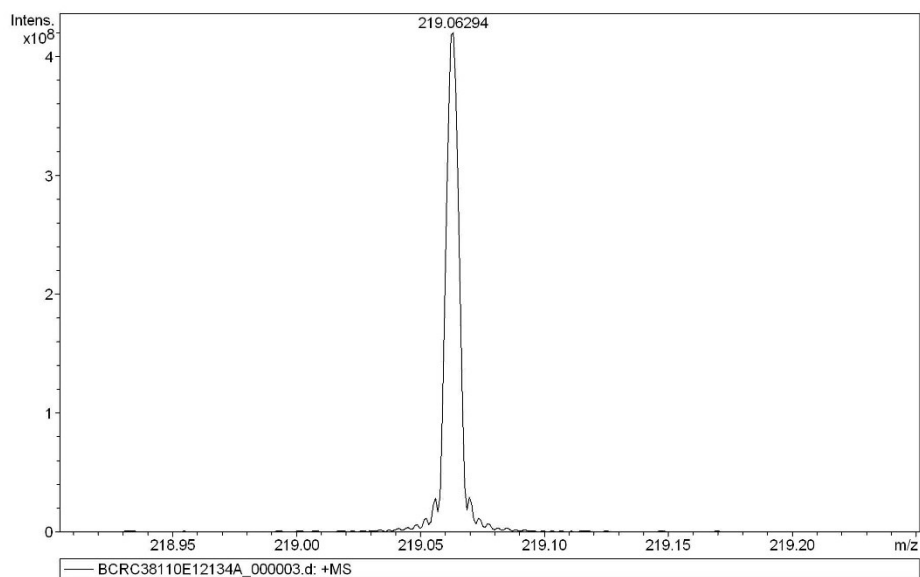

| Meas. m/z | # | Formula                                          | Score  | m/z       | err [mDa] | err [ppm] | mSigma | rdb | e <sup>-</sup> Conf | N-Rule |
|-----------|---|--------------------------------------------------|--------|-----------|-----------|-----------|--------|-----|---------------------|--------|
| 219.06294 | 1 | C <sub>10</sub> H <sub>12</sub> NaO <sub>4</sub> | 100.00 | 219.06278 | -0.16     | -0.73     | 13.1   | 4.5 | even                | ok     |

Figure S50. HRMS spectrum of monabenzofuranone (7)

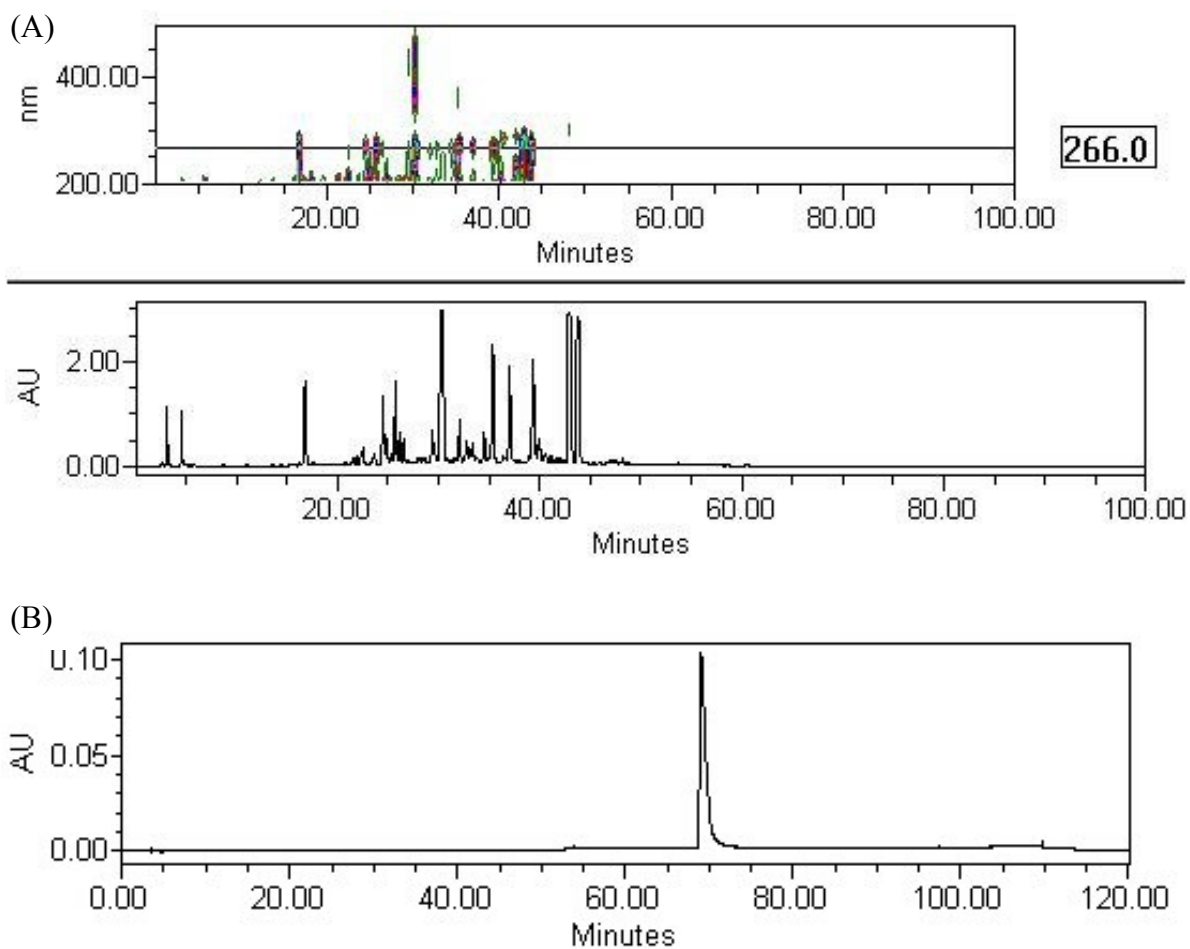

Figure S51. (A) HPLC chromatographic profile of red mold rice from *Monascus purpureus* BCRC 38110. (B) HPLC chromatographic profile of citrinin

The dried red yeast rice of *Monascus purpureus* BCRC 38110 (1.5 kg)

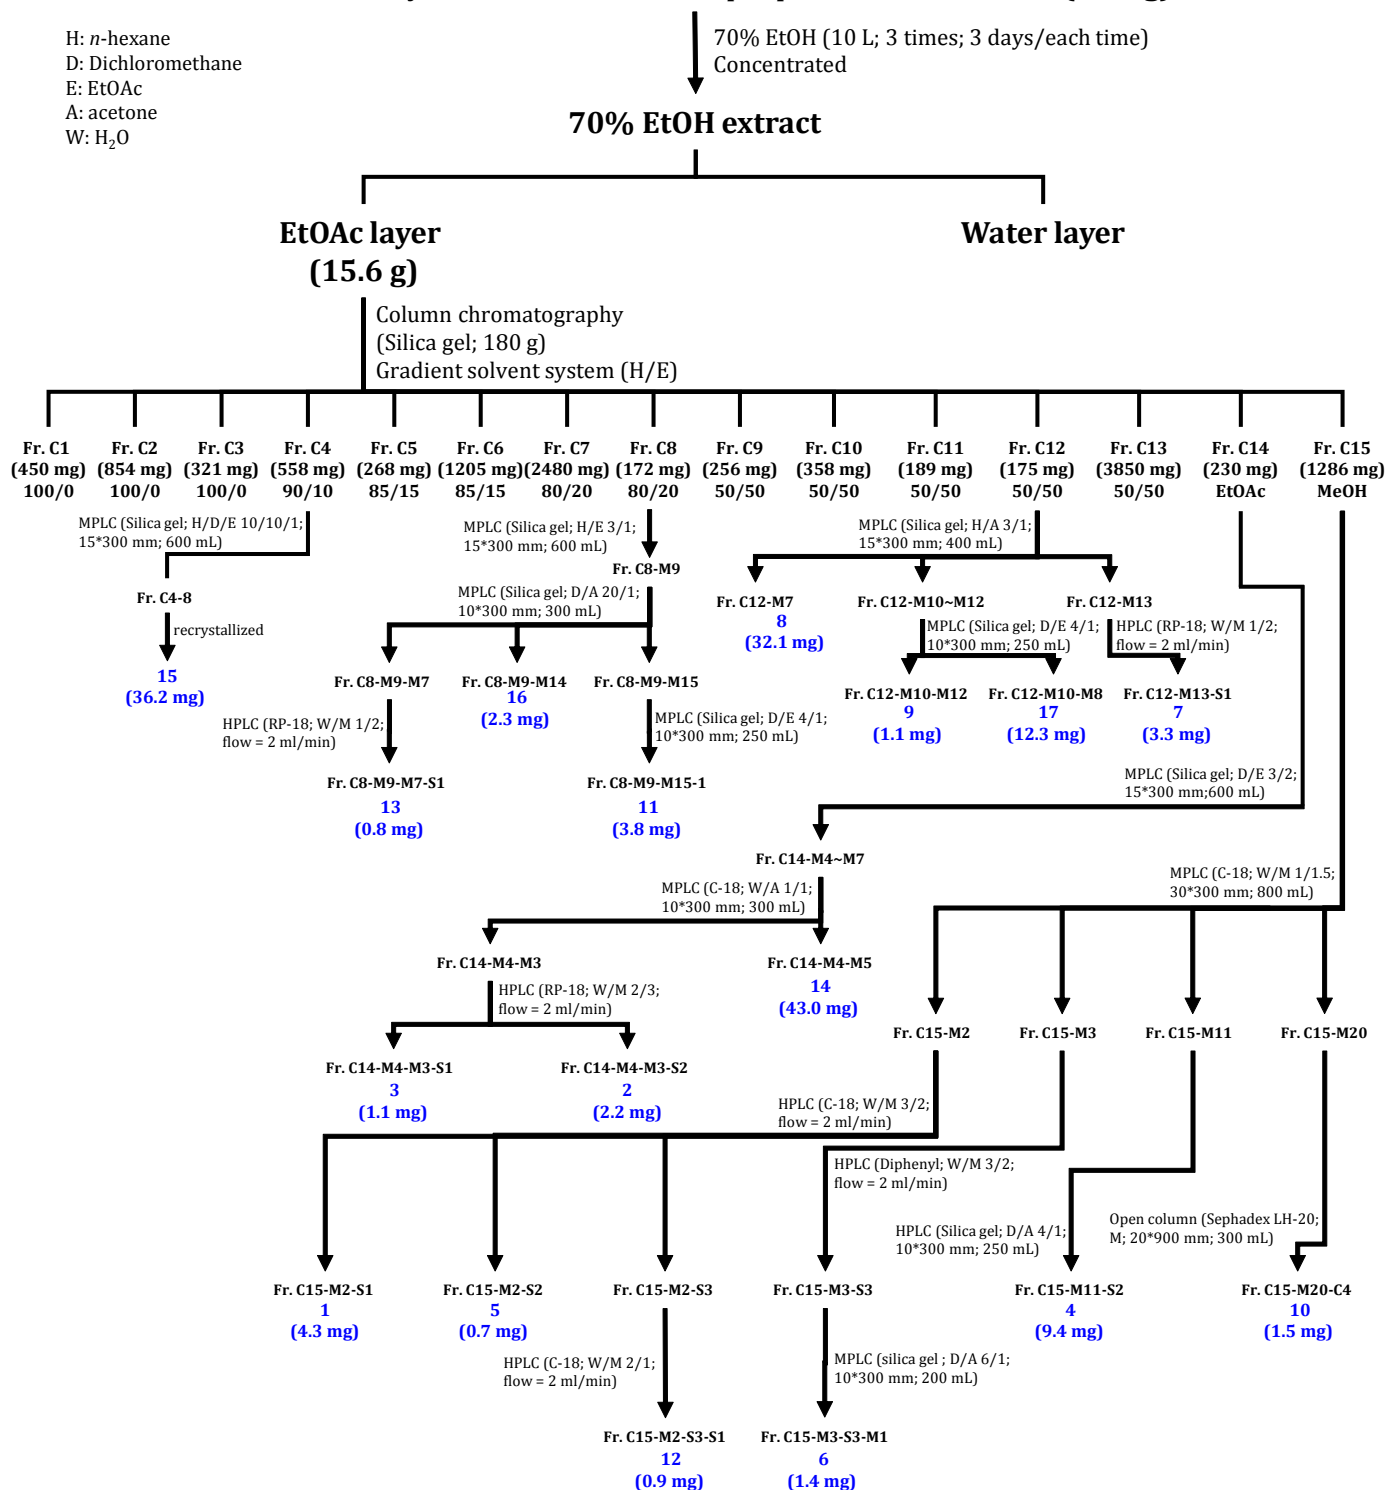

Figure S52. The isolation flowchart of *M. purpureus* BCRC 38110
